1 ***In vivo* CRISPR-Cas gene editing with no detectable genome-wide off-target mutations**

2  
3

4 Pinar Akcakaya<sup>1,\*</sup>, Maggie L. Bobbin<sup>2,3,\*</sup>, Jimmy A. Guo<sup>2</sup>, Jose M. Lopez<sup>2,3</sup>, M. Kendell  
5 Clement<sup>2,3</sup>, Sara P. Garcia<sup>2</sup>, Mick D. Fellows<sup>4</sup>, Michelle J. Porritt<sup>1</sup>, Mike A. Firth<sup>5</sup>, Alba Carreras<sup>1,6</sup>,  
6 Tania Baccega<sup>1,7</sup>, Frank Seeliger<sup>8</sup>, Mikael Bjursell<sup>1</sup>, Shengdar Q. Tsai<sup>2,3,9</sup>, Nhu T. Nguyen<sup>2</sup>,  
7 Roberto Nitsch<sup>4</sup>, Lorenz M. Mayr<sup>1,10</sup>, Luca Pinello<sup>2,3</sup>, Mohammad Bohlooly-Y<sup>1</sup>, Martin J. Aryee<sup>2,3</sup>,  
8 Marcello Maresca<sup>1</sup>, J. Keith Joung<sup>2,3</sup>

9

10 <sup>1</sup>Discovery Biology, Discovery Sciences, IMED Biotech Unit, AstraZeneca, Gothenburg, Sweden.

11 <sup>2</sup>Molecular Pathology Unit, Center for Cancer Research, and Center for Computational and  
12 Integrative Biology, Massachusetts General Hospital, Charlestown, Massachusetts, USA.

13 <sup>3</sup>Department of Pathology, Harvard Medical School, Boston, Massachusetts, USA.

14 <sup>4</sup>New Drug Modalities, Drug Safety and Metabolism, IMED Biotech Unit, AstraZeneca,  
15 Cambridge, United Kingdom.

16 <sup>5</sup>Discovery Biology, Quantitative Biology, IMED Biotech Unit, AstraZeneca, Cambridge, United  
17 Kingdom.

18 <sup>6</sup>Current address: Wallenberg Laboratory and Sahlgrenska Center for Cardiovascular and  
19 Metabolic Research, Department of Molecular and Clinical Medicine, University of Gothenburg,  
20 Gothenburg, Sweden.

21 <sup>7</sup>Current address: San Raffaele Telethon Institute for Gene Therapy, IRCCS San Raffaele  
22 Scientific Institute, Via Olgettina 58, Milan, Italy.

23 <sup>8</sup>Pathology Science, Drug Safety and Metabolism, IMED Biotech Unit, AstraZeneca, Gothenburg,  
24 Sweden.

25 <sup>9</sup>Current address: Department of Hematology, St. Jude Children's Research Hospital,  
26 Memphis, Tennessee, USA.

27 <sup>10</sup>Current address: GE Healthcare Life Sciences, The Grove Centre, White Lion Road,  
28 Amersham, HP7 9LL, United Kingdom.

29

30 \*These authors contributed equally and are therefore listed alphabetically by last name

31

32 Correspondence and requests for materials should be addressed to J. Keith Joung at

33 [jjoung@mgh.harvard.edu](mailto:jjoung@mgh.harvard.edu) or Marcello Maresca at [marcello.maresca@astrazeneca.com](mailto:marcello.maresca@astrazeneca.com)

34 CRISPR-Cas genome-editing nucleases hold substantial promise for human therapeutics<sup>1-5</sup> but  
35 identifying unwanted off-target mutations remains an important requirement for clinical  
36 translation<sup>6, 7</sup>. For *ex vivo* therapeutic applications, previously published cell-based genome-  
37 wide methods provide potentially useful strategies to identify and quantify these off-target  
38 mutation sites<sup>8-12</sup>. However, a well-validated method that can reliably identify off-targets *in vivo*  
39 has not been described to date, leaving the question of whether and how frequently these  
40 types of mutations occur. Here we describe Verification of *In Vivo* Off-targets (**VIVO**), a highly  
41 sensitive, unbiased, and generalizable strategy that we show can robustly identify genome-wide  
42 CRISPR-Cas nuclease off-target effects *in vivo*. To our knowledge, these studies provide the first  
43 demonstration that CRISPR-Cas nucleases can induce substantial off-target mutations *in vivo*, a  
44 result we obtained using a deliberately promiscuous guide RNA (**gRNA**). More importantly, we  
45 used VIVO to show that appropriately designed gRNAs can direct efficient *in vivo* editing  
46 without inducing detectable off-target mutations. Our findings provide strong support for and  
47 should encourage further development of *in vivo* genome editing therapeutic strategies.

48  
49 We envisioned VIVO as a two-step strategy to identify CRISPR-Cas nuclease off-target mutations  
50 *in vivo* (**Fig. 1a**). In an initial *in vitro* “discovery” step, potential off-target cleavage sites of a  
51 nuclease of interest are identified on purified genomic DNA using the recently described  
52 CIRCLE-seq method<sup>13</sup>. We used CIRCLE-seq because it is highly sensitive and avoids potential  
53 confounding effects associated with cell-based assays performed using surrogate cells in  
54 culture<sup>13</sup>. In a second *in vivo* “confirmation” step, off-target sites identified *in vitro* by CIRCLE-  
55 seq are examined for evidence of indel mutations in the genomic DNA of target tissues that

56 have been treated with the nuclease. We hypothesized that this two-step strategy might be  
57 effective because we have previously shown that the sensitivity of CIRCLE-seq enables it to  
58 identify a superset of off-target cleavage sites that includes a subset of loci actually  
59 mutagenized in nuclease-treated cells in culture<sup>13</sup>.

60

61 To test the VIVO strategy, we first designed a *Streptococcus pyogenes* Cas9 (**SpCas9**) gRNA  
62 intentionally selected for its high likelihood of inducing multiple off-target mutations in the  
63 mouse genome. This promiscuous gRNA (**gP**) targets a sequence within the coding sequence of  
64 exon 1 in the mouse *Pcsk9* gene (**Fig. 1b**) and was chosen because it has many closely related  
65 sites (i.e., sequences having one, two or three mismatches relative to the on-target site) in the  
66 mouse genome (**Online Methods; Extended Data Table 1**). To deliver nucleases efficiently to  
67 mouse livers *in vivo* (**Fig. 1a**), we infected cohorts of mice with adenoviral vectors encoding  
68 both SpCas9 and gP or with a control virus encoding SpCas9 and GFP. We infected two related  
69 strains of mice: a wild-type C57BL/6N strain (hereafter referred to as “**WT**” mice) and a  
70 derivative of the C57BL/6N strain that harbors a single copy of a human *PCSK9* cDNA knocked  
71 into the *Rosa26* locus (hereafter referred to as “**KI**” mice; Carreras A & Pane SL et al.,  
72 manuscript in preparation). We observed efficient targeted modification of the on-target *Pcsk9*  
73 site (as judged by the Surveyor assay) in liver tissue of both WT and KI mice infected with  
74 gP/SpCas9 adenoviral vector at both four days and three weeks post-infection (**Fig. 1c**).  
75 Consistent with this, plasma levels of mouse Pcsk9 protein were reduced in both mouse strains  
76 treated with the gP/SpCas9 vector compared to those treated with negative control vector at  
77 four days, one week, and three weeks post-infection (**Fig. 1d**). Because bio-distribution studies

78 of our adenoviral vectors in mice showed selective delivery to liver (**Extended Data Fig. 1**), we  
79 focused our analysis of nuclease-induced indel mutations on this organ.  
80  
81 Having established the efficacy of gP/SpCas9 for *in vivo* on-target *Pcsk9* modification, we  
82 conducted the first screening step of VIVO by performing CIRCLE-seq with this nuclease on  
83 genomic DNA isolated from the livers of WT and KI mice (**Fig. 1a; Online Methods**). As  
84 expected, these experiments identified a large number of *in vitro* off-target cleavage sites for  
85 the gP gRNA: 3107 and 2663 sites with the WT and KI mice genomes, respectively (**Fig. 1e** and  
86 **Supplementary Table 1**), although these sites represent only a small percentage of all sites in  
87 the genome that have seven or fewer mismatches relative to the on-target site (**Extended Data**  
88 **Fig. 2**). As expected, 2368 of the sites were identified in both mouse genomes and showed  
89 strong concordance ( $r^2 = 0.902$ ) in their numbers of CIRCLE-seq read counts between the two  
90 mice strains (we have previously shown that CIRCLE-seq counts provide a semi-quantitative  
91 reflection of cleavage efficiency<sup>13</sup>) (**Fig. 1e**). Sites identified in only one genome or the other  
92 generally had among the lowest CIRCLE-seq read counts (**Fig. 1e**), consistent with the idea that  
93 differential detection might be related to assay limit of detection (although SNPs might also  
94 play a role for a subset of sites as well (**Extended Data Table 2**)). The 20 off-target sites with the  
95 highest CIRCLE-seq read counts all had three or fewer mismatches in the spacer sequence  
96 relative to the on-target site (**Fig. 1e** and **Supplementary Table 1**). Several off-target sites  
97 contained mismatches in the protospacer adjacent motif (**PAM**) sequence, with NAG PAM as  
98 the most prevalent (**Fig. 1e** and **Supplementary Table 1**), consistent with data from previously  
99 published studies<sup>8, 13-15</sup>.

100

101 To perform the second validation step of VIVO, we examined whether gP off-target cleavage  
102 sites identified by CIRCLE-seq showed *in vivo* evidence of indel mutations in the livers of WT  
103 and KI mouse treated with gP/SpCas9. Because of the very large number of potential gP CIRCLE-  
104 seq off-target sites, we performed targeted amplicon sequencing on the following subset of  
105 sites on three different mice at both the four day and three week time points: the *Pcsk9* on-  
106 target site, 11 “Class I” off-target cleavage sites with the highest CIRCLE-seq read counts  
107 (harboring one to three mismatches relative to the on-target site), 17 “Class II” sites with  
108 moderate CIRCLE-seq read counts (harboring two to four mismatches), and 17 “Class III” sites  
109 with lower CIRCLE-seq read counts (harboring one to six mismatches) (**Figs. 1e and 2**).

110 Consistent with the Surveyor assay results, we found that the *Pcsk9* on-target site was  
111 efficiently mutagenized and remained stable over time in both WT and KI mice, with mean indel  
112 frequencies ranging from ~23 to 30% (**Fig. 2 and Supplementary Table 2**). 19 of the 45 potential  
113 off-target sites we examined showed significant evidence of indel mutations (mean frequencies  
114 ranging from 41.9% to 0.13%) in the livers of both WT and KI mice at four days and three weeks  
115 post-infection relative to untreated controls (**Fig. 2 and Supplementary Table 2**). Notably,  
116 higher CIRCLE-seq read count generally correlated well with the probability of finding indel  
117 mutations *in vivo* – 11 out of the 11 Class I off-target sites, 5 out of the 17 Class II sites, and 3  
118 out of the 17 Class III sites were shown to harbor indels in mouse liver DNA (**Fig. 2**). In addition,  
119 all 19 of these verified *in vivo* off-target sites had three or fewer mismatches relative to the on-  
120 target site, with the majority located within gene coding sequences (**Fig. 2**). Three additional  
121 sites, including two sites each containing three mismatches in the spacer and one mismatch in

122 the PAM, showed significant indel mutations at only the four-day time point, but were no  
123 longer significant by three weeks; the mutation frequencies observed at these sites were  
124 around 0.13%, which is close to the limit of detection (0.1%) for this assay. Taken together, our  
125 data shows that SpCas9 with a promiscuous gRNA can generate off-target mutations *in vivo* (in  
126 some cases with very high frequencies) that are stable over time and that our VIVO approach  
127 can also identify even low frequency mutations (as low as 0.13%).

128  
129 Because actual therapeutic applications would never use a gRNA expected to have a high  
130 degree of similarity to many loci in the genome, we sought to characterize the *in vivo* genome-  
131 wide off-target profiles of SpCas9 gRNAs designed for sites that are more orthogonal to the  
132 mouse genome. Thus, we constructed two additional gRNAs, which we named gM and gMH, to  
133 target sites in the mouse *Pcsk9* gene coding sequence (**Fig. 3a**). In contrast to gP, these gRNAs  
134 have relatively few closely matched sites (i.e., those with one, two or three mismatches relative  
135 to the on-target site) in the C57BL6/N mouse genome (**Extended Data Table 1**). gM has been  
136 previously described and characterized in an earlier study<sup>16</sup>. gMH is also predicted to target a  
137 site in the human *PCSK9* transgene present in the KI mouse that has one mismatch relative to  
138 the on-target site (**Fig. 3a**). To test gM and gMH with SpCas9 *in vivo*, we delivered each  
139 gRNA/nuclease pair (and the GFP/SpCas9 negative control) using adenoviral vectors to WT and  
140 KI mice. Surveyor assays performed with liver genomic DNA showed efficient and stable  
141 modification of the on-target mouse *Pcsk9* site with gM and gMH in WT and KI mice and of the  
142 human *PCSK9* transgene site with gMH in the KI mouse (**Fig. 3b**). In addition, we observed  
143 significant and stable reductions of mouse PCSK9 protein over time in plasma with gM and gMH

144 in both mouse strains and of human PCSK9 protein in plasma with gMH in the KI mouse (**Fig.**  
145 **3c**).

146  
147 To carry out the first *in vitro* step of VIVO with gM/SpCas9 and gMH/SpCas9, we performed  
148 CIRCLE-seq experiments on genomic DNA from WT and KI mice. We identified a more moderate  
149 number of off-target sites than what was obtained with gP/SpCas9: 129 sites for gM on WT  
150 mouse DNA, 145 sites for gM on KI mouse DNA, 333 sites for gMH on WT mouse DNA, and 394  
151 sites for gMH on KI mouse DNA (**Fig. 3d, Supplementary Tables 3 and 4**). As we found with the  
152 gP gRNA, most of the off-target cleavage sites for gM and gMH were identified in both mouse  
153 genomes with good concordance in their CIRCLE-seq read counts ( $r^2 = 0.747$  and  $0.841$ ,  
154 respectively) (**Fig. 3d**). Sites found in only one mouse genome or the other generally had low  
155 read counts (**Fig. 3d**). As expected, CIRCLE-seq identified the on-target mouse *Pcsk9* in all four  
156 experiments and the human *PCSK9* transgene site only in the experiment with gMH on the KI  
157 mouse DNA (**Fig. 3d**). Most of the potential off-target sites identified with both gRNAs had  
158 three or more mismatches relative to the on-target site, consistent with the higher degree of  
159 on-target site orthogonality to the mouse genome.

160  
161 To conduct the second *in vivo* step of VIVO, we performed targeted amplicon sequencing of  
162 potential gM and gMH off-target sites found by CIRCLE-seq using genomic DNA isolated from  
163 the livers of adenovirus-treated WT and KI mice. For gM, we comprehensively examined 181 of  
164 the 182 off-target CIRCLE-seq cleavage sites (one site could be amplified but not sequenced,  
165 see **Online Methods**) and the on-target site. Each site was examined in three WT and three KI

166 mice, from liver DNA harvested at 4 days or 3 weeks following adenovirus infection. Strikingly,  
167 the only site that showed significant indel mutations (relative to mice treated with the control  
168 GFP/SpCas9 virus) was the intended gM on-target site (indel frequencies ranging from 12.6% to  
169 18.5%) (**Fig. 4** and **Supplementary Table 5**); no significant off-target indels were identified in  
170 any mice at either the four-day or three-week timepoints. For gMH, because CIRCLE-seq  
171 identified a large number of potential off-target sites (529 in total in WT and/or KI mouse  
172 genomic DNA), we examined the on-target site and a subset of 69 potential off-target sites with  
173 up to six mismatches that had the highest CIRCLE-seq read counts. These 69 sites encompassed  
174 all but one of the CIRCLE-seq sites that had up to three mismatches (one site could be amplified  
175 but not sequenced, see **Online Methods**) and also included the human *PCSK9* transgene site  
176 (which bears one mismatch) (**Fig. 3d**). Our choice to test this subset of sites for the gMH gRNA  
177 was guided by our findings that none of the 19 *bona fide in vivo* off-target sites we found for  
178 gP/SpCas9 had four or more mismatches relative to the on-target site (**Fig. 2**). Among the sites  
179 we assessed, we found significant indel mutations at only two sites: the on-target mouse gMH  
180 site (indel frequencies ranging from 27.4% to 43.6%) and the human *PCSK9* transgene site  
181 bearing one mismatch (indel frequencies ranging from 20.4% to 21.7%) (**Extended Data Fig. 3**;  
182 **Supplementary Table 6**).

183

184 Given the lack of any observable off-target mutations for gM and gMH *in vivo*, we undertook  
185 additional targeted amplicon sequencing to examine the most closely matched sites in the  
186 mouse C57BL/6N genome (harboring one, two, or three mismatches in the spacer sequence)  
187 that were not identified by our CIRCLE-seq assays (4 sites for gM and 10 sites for gMH)



188 **(Extended Data Table 1)**. Three of the gM sites could not be individually selectively amplified  
189 and so these sites were assessed together as a pool **(Online Methods)**. Once again, we did not  
190 observe significant indel mutations at any of these additional sites in all four sets of treated  
191 mice at both time points **(Fig. 4; Extended Data Fig. 3; and Supplementary Tables 5 and 6)**.  
192  
193 Our results provide, to our knowledge, the first convincing demonstration that CRISPR-Cas  
194 nucleases can indeed induce significant off-target mutations *in vivo*. Previous *in vivo* studies  
195 have reported no or very few off-target mutations but used approaches that have not been  
196 validated to effectively identify these sites *in vivo*<sup>10, 16-31</sup>. Most of these previous reports used  
197 computational *in silico* approaches that are known to miss many *bona fide* off-target sites in  
198 cell-based systems, making their efficacy questionable in an *in vivo* setting. Three of these  
199 studies<sup>17-19</sup> used the cell-based GUIDE-seq method<sup>8</sup> to determine what sites to examine *in vivo*  
200 and only one found a single low-level off-target (frequency ~1%); however, GUIDE-seq was  
201 performed on surrogate cells in culture in these experiments, a strategy that may miss off-  
202 target sites that occur in the actual target tissue *in vivo*. Our development and validation of  
203 VIVO now enables the robust identification of off-target sites *in vivo* (with frequencies as low as  
204 ~0.1%), with its efficacy likely stemming from the high sensitivity of the *in vitro* CIRCLE-seq  
205 method. It is important to emphasize that the *in vivo* detection limit of VIVO, like all existing off-  
206 target determination methods, is limited by the current error rate of next-generation  
207 sequencing, which sets a floor of about 0.1%. Improving the sensitivity of VIVO will therefore  
208 require overcoming this limitation or developing alternatives to targeted amplicon sequencing,

209 an especially important goal given the very large number of cells that would be modified with  
210 an *in vivo* CRISPR-Cas nuclease therapeutic.

211

212 Our results and the VIVO method define a pathway for assessing and optimizing the *in vivo*  
213 genome-wide specificities of CRISPR-Cas nucleases. With VIVO, we have convincingly shown  
214 that SpCas9 gRNAs can be designed that fail to induce detectable off-target effects *in vivo* while  
215 still efficiently and stably modifying their intended on-target site in mouse liver. Based on these  
216 successes, we recommend the initial design of gRNAs with the lowest possible number of  
217 closely matched sites (i.e., those with three or fewer mismatches relative to the on-target site)  
218 in the target genome, something that can be accomplished using existing *in silico* tools<sup>32</sup>. These  
219 gRNAs can then be assessed by CIRCLE-seq to identify those that exhibit a reasonable number  
220 (e.g., less than 100-200) of potential off-target sites (VIVO Step 1), which can then be  
221 comprehensively examined for indel mutations *in vivo* using targeted amplicon sequencing  
222 (VIVO Step 2). For even greater certainty, we also suggest the examination of any closely  
223 matched sites (3 or fewer mismatches) in the genome that are not identified by CIRCLE-seq as  
224 we did for the gM and gMH gRNAs in this study. Any persistent off-target mutations might be  
225 reduced to undetectable levels by using high-fidelity CRISPR-Cas nuclease variants<sup>33-35</sup>. In  
226 addition, the delivery of RNAs or ribonucleoprotein complexes (rather than DNA by viral vector  
227 as we did in this study) might also further reduce off-target mutations<sup>36</sup>.

228

229 We believe that the VIVO approach described here sets a new and important standard for  
230 defining off-target effects in future *in vivo* studies. The approach is generalizable and can be

231 used irrespective of the method used to deliver the CRISPR-Cas nucleases. We used adenovirus  
232 in this study to achieve efficient liver delivery but VIVO could also be used with other viral or  
233 non-viral delivery strategies (e.g., retroviral and lentiviral vectors, lipid nanoparticles). With  
234 some minor modification of the CIRCLE-seq protocol, VIVO should also work with other types of  
235 nucleases (e.g., zinc finger nucleases, meganucleases, transcription activator-like effector  
236 nucleases, CRISPR-Cpf1/Cas12a nucleases). We envision that VIVO might also be extended to  
237 non-mammalian organisms (e.g., mosquitoes and plants). One can envision that the VIVO  
238 approach could eventually be used in a patient-specific fashion, thereby addressing concerns  
239 about the impact of individual genomic variation on off-target profiles<sup>37, 38</sup>. Overall, we believe  
240 that results and methods described here should strongly motivate the development and  
241 advancement of *in vivo* genome editing therapeutics.

242

## 243 **Online Methods**

### 244 **Guide RNA design**

245 We identified the promiscuous gP gRNA by searching for an on-target sequence within mouse  
246 *Pcsk9* (ENSG00000169174) exons one to three that shows a high number of closely matched  
247 sites (two or fewer mismatches to the on-target site) in the mouse genome. To identify gMH,  
248 we searched for a gRNA that can cleave both mouse *Pcsk9* and human *PCSK9* and that showed  
249 a perfect alignment to mouse *Pcsk9* and up to two nucleotides mismatch to human  
250 *PCSK9* (ENSMUSG000000254) at least eight nucleotides distal to the PAM. For both gRNA  
251 designs we used AstraZeneca proprietary software as an *in silico* tool, which was developed  
252 based on Wellcome Trust Sanger Institute's codebase

253 (WGE: <http://www.sanger.ac.uk/htgt/wge/>)<sup>39</sup> with the addition of the NAG PAM motif as well  
254 as NGG in the alignments for potential off-targets<sup>14</sup>. GRCm38/mm10 and GRCh38/hg38  
255 genomes were used as reference for alignments. The gM gRNA targeted to mouse *Pcsk9* has  
256 been previously described<sup>16</sup>.

### 257 **Adenoviral constructs**

258 Adenoviruses that express SpCas9 and gRNAs (Ad-Cas9-gM, Ad-Cas9-gMH, Ad-Cas9-gP) were  
259 generated by Vector Biolabs (Malvern, PA, USA). SpCas9 and gRNAs were expressed from  
260 chicken  $\beta$ -actin hybrid (CBh) and U6 promoters, respectively, in a replication-deficient  
261 adenoviral-serotype 5 (dE1/E3) backbone. A negative control adenovirus (Ad-Cas9-GFP) that  
262 expresses Cas9 and GFP from the CBh and CMV promoters, respectively, but no gRNA was also  
263 generated.

### 264 **Animal studies**

265 All animal experiments were approved by the AstraZeneca internal committee for animal  
266 studies as well as the Gothenburg Ethics Committee for Experimental Animals, (license number:  
267 162-2015+) compliant with EU directives on the protection of animals used for scientific  
268 purposes.

269 C57BL/6N mice (Charles River, Sulzfeld, Germany) were individually housed in a temperature  
270 ( $21\pm 2^\circ\text{C}$ ) and humidity ( $55\pm 15\%$ ) controlled room with a 12:12 hours light:dark cycle. R3 diet  
271 (Lactamin AB, Stockholm, Sweden) and tap water were provided *ad libitum*. Cage bedding and  
272 enrichments include spen chips, shredded paper, gnaw sticks and a plastic house.  
273 Humanized hypercholesterolemia mouse model was generated by liver-specific overexpression  
274 of human PCSK9 in C57BL/6N mice (Carreras A & Pane SL et al., manuscript in preparation).

275 Briefly, we cloned human PCSK9 cDNA from the HEK293 genome downstream of the mouse  
276 albumin promoter isolated from Albumin-Cre mice (B6.Cg-Tg(Alb-cre)21Mgn/J, the Jackson  
277 Laboratory, Bar Harbor, MN) in a vector designed to target the mouse *Rosa26* locus. Mouse  
278 embryonic stem cells were electroporated with linearized plasmid. Clones that have integration  
279 in *Rosa26* locus were selected with neomycin resistance and used for mouse generation.

280 For *in vivo* *Pcsk9* gene editing, nine- to eleven-week-old male mice received a tail vein injection  
281 with a dose of  $1 \times 10^9$  infection units (IFU) adenovirus (Ad-Cas9-gM, Ad-Cas9-gMH, Ad-Cas9-gP  
282 or Ad-Cas9-GFP) in 200  $\mu$ l diluted with phosphate-buffered saline. Peripheral blood was  
283 sampled before virus administration (baseline), a week after virus administration, and at  
284 termination (four days or three weeks after virus administration). Animals were euthanized by  
285 cardiac puncture under isoflurane anesthesia at the experimental endpoint. The organs  
286 including liver, spleen, lungs, kidney, muscle, brain, and testes were dissected, snap-frozen in  
287 liquid nitrogen and stored at -80 until further analyses.

288 Genomic DNA from frozen tissues was isolated using the Gentra Puregene Tissue kit (Qiagen,  
289 Hilden, Germany). *In vivo* gene editing efficiency was evaluated using Surveyor mismatch  
290 cleavage assay (Integrated DNA Technologies, BVBA, Leuven, Belgium) and targeted deep  
291 sequencing (primers are listed in **Supplementary Tables 2, 5, and 6**).

#### 292 **Assessment of human PCSK9/mouse Pcsk9 protein levels in plasma**

293 Peripheral blood was collected in EDTA-coated capillary tubes from *vena saphena* during the  
294 course of the study and by cardiac puncture at the time of termination. Samples were kept on  
295 ice for up to 2 hours prior to extraction of plasma by centrifugation at 10,000 rpm for 20 min at  
296 4°C. Plasma was stored at -80°C until the samples were analyzed. Plasma human PCSK9 and

297 mouse Pcsk9 levels were determined with a standard ELISA kit (DPC900 and MPC900; R&D  
298 Systems, Minneapolis, MN, USA) according to the manufacturer's instructions. Prior to the  
299 assay, plasma samples were diluted 1:1000 and 1:800 for human PCSK9 and mouse Pcsk9,  
300 respectively.

### 301 **Reference Genome for CIRCLE-seq, CRISPResso and Cas-OFFinder**

302 We used build 38 of the C57BL/6NJ genome, sequenced by the Sanger Mouse Genomes Project  
303 ([http://csbio.unc.edu/CCstatus/pseudo2/C57BL6NJ\\_b38\\_f.fa.gz](http://csbio.unc.edu/CCstatus/pseudo2/C57BL6NJ_b38_f.fa.gz)). We included the human  
304 PCSK9 gene DNA sequence inserted into the mouse genome as an extra chromosome in the  
305 reference and named it "chrPCSK9KI".

### 306 **CIRCLE-seq**

307 CIRCLE-seq was performed experimentally as previously described<sup>13</sup>. Data was processed using  
308 v1.1 of the CIRCLE-Seq analysis pipeline<sup>40</sup> (<https://github.com/tsailabSJ/circleseq>) with  
309 parameters: "window\_size: 3; mapq\_threshold: 50; start\_threshold: 1; gap\_threshold: 3;  
310 mismatch\_threshold: 7; merged\_analysis: False; variant\_analysis: True".

### 311 **Targeted amplicon deep sequencing**

312 Genomic DNA from liver tissue of adenovirus injected mice was extracted at 4 days and 3 weeks  
313 post-treatment for indel analysis. As detailed in the text, to validate off-targets identified by  
314 CIRCLE-seq for gP we selected sites with read counts above 50% of the on-target and a variety  
315 of lower-ranked sites (containing up to 6 mismatches relative to the on-target) for targeted  
316 deep sequencing. In addition, to rule out that CIRCLE-seq was not missing potential off-target  
317 sites identified by *in silico* tools, we sequenced all sites containing up to 3 mismatches identified  
318 by Cas-OFFinder<sup>32</sup> for gM and gMH. All sites analyzed were amplified from 150 ng of input

319 genomic DNA (approximately  $5 \times 10^4$  genomes) with Phusion Hot Start Flex DNA polymerase  
320 (New England Biolabs). PCR products were purified using magnetic beads made as previously  
321 described<sup>41</sup>, quantified using a QuantiFlor dsDNA System kit (Promega), normalized to 10 ng/ $\mu$ L  
322 per amplicon, and pooled. Pooled samples were end-repaired and A-tailed using an end prep  
323 enzyme mix and reaction buffer from NEBNext Ultra II DNA Library Prep Kit for Illumina, and  
324 ligated to Illumina TruSeq adapters using a ligation master mix and ligation enhancer from the  
325 same kit. Library-prepped samples were then purified with magnetic beads made as previously  
326 described<sup>41</sup>, size-selected using PEG/NaCl SPRI solution (KAPA Biosystems), quantified using  
327 droplet digital PCR (BioRad), and loaded onto an Illumina MiSeq for deep sequencing. To  
328 analyze amplicon sequencing of potential on- and off-targets, we used CRISPResso software<sup>42</sup>  
329 v1.11 (<https://github.com/lucapinello/crispresso>) with the following parameters: '-q 30 --  
330 ignore\_substitutions --hide\_mutations\_outside\_window\_NHEJ'.  
331 For each of the 45 gP off-target sites we examined, we obtained 10,000 or more sequencing  
332 reads in at least two samples for treated and control samples at all time points (**Supplementary**  
333 **Table 2**). One potential gM off-target site (chr15:98037617-98037640) and one potential gMH  
334 off-target site (chr15:4878177-4878200) were amplified but could not be successfully  
335 sequenced. The problematic gM site was amplified with two different sets of primers and both  
336 amplicons failed to sequence. The gMH site is in a highly repetitive area with low complexity,  
337 and we were unable to differentiate this site from other sites in the genome so the site was  
338 removed from analysis. For all of the gM off-target sites we were able to sequence, we  
339 obtained 10,000 or more sequencing reads in at least two samples for treated and control  
340 samples at all time points (**Supplementary Table 5**). For all but one of the gMH off-target sites

341 we were able to sequence, we obtained 10,000 or more sequencing reads in at least two  
342 samples for treated and control samples at all time points (**Supplementary Table 6**). One of the  
343 gMH off-target sites we sequenced (chr17:33501685-33501708) did not reach the 10,000 read  
344 threshold for any samples or time points but read counts ranged from 2509 to 9149. For the  
345 three sites that were identified *in silico* as being highly similar to the gM on-target site but that  
346 were not identified by CIRCLE-seq, we were unable to selectively amplify these sites individually  
347 due their sequence similarities: chr14:25878231-25878254, chr14:26018001-26018024 and  
348 chr14:26157615-26157638. Therefore, for these three sites, the read counts were pooled into  
349 one amplicon that encompasses all locations and that is labelled as “chr14:pooled” in  
350 **Supplementary Table 5.**

#### 351 **Cas-OFFinder:**

352 Identification of potential off-targets by Cas-OFFinder<sup>32</sup> ([https://github.com/snugel/cas-](https://github.com/snugel/cas-offinder)  
353 [offinder](https://github.com/snugel/cas-offinder)) was done using the off-line version allowing up to 7 mismatches and non-canonical  
354 PAMs. We then restricted the output to the sites with at most 6 mismatches in the spacer and  
355 at most 1 mismatch in the PAM.

#### 356 **Non-reference genetic variation:**

357 samtools mpileup 1.3.1<sup>43</sup> was used to discover non-reference genetic variation at the off-target  
358 sites identified by CIRCLE-seq. Positions with a genotype quality score greater than 5 and depth  
359 of at least 3 were considered as potential variants if they did not fall adjacent to the cleavage  
360 site or at the edge of the reads and were not located in a highly repetitive region with poor  
361 mapping quality.

#### 362 **Statistical analysis**



363 Data visualization and statistical analyses for plasma protein measurements were performed  
364 using GraphPad Prism 7.02. Protein levels after the adenoviral administration were normalized  
365 to baseline levels, and values for gRNA treatment groups were compared with the control  
366 treatment group. Comparisons between groups were performed using two-way ANOVA and  
367 Dunnett's multiple comparisons test.  $p \leq 0.05$  was considered to be statistically significant.

### 368 **Statistical analysis of targeted amplicon deep sequencing data**

369  $p$ -values were obtained by fitting a negative binomial generalized linear model (function  
370 MASS:glm.nb in R version 3.4.2) to the control and nuclease-treated samples for each evaluated  
371 site and adjusted for multiple comparisons using the Benjamini and Hochberg method (function  
372 p.adjust in R version 3.4.2). Multiple testing adjustment was performed within strata defined by  
373 guide, mouse background, and timepoint. We considered the indel percentage in the  
374 gRNA/SpCas9-treated replicates to be significantly greater than the indel percentage in the  
375 GFP/SpCas9-treated controls if the adjusted  $p$ -value was less than 0.1, the model parameter is  
376 greater than zero, and the median indel frequency of the treated replicates is greater than  
377 0.1%.

### 378 **Data availability:**

379 The data sets generated and analyzed as part of this study are available upon request from the  
380 corresponding authors and will be available publicly upon publication.

381

### 382 **References**

- 383 1. Musunuru, K. The Hope and Hype of CRISPR-Cas9 Genome Editing: A Review. *JAMA*  
384 *cardiology* **2**, 914-919 (2017).

- 385 2. Fellmann, C., Gowen, B.G., Lin, P.C., Doudna, J.A. & Corn, J.E. Cornerstones of CRISPR-  
386 Cas in drug discovery and therapy. *Nat Rev Drug Discov* **16**, 89-100 (2017).
- 387 3. Komor, A.C., Badran, A.H. & Liu, D.R. CRISPR-Based Technologies for the Manipulation of  
388 Eukaryotic Genomes. *Cell* **168**, 20-36 (2017).
- 389 4. Koo, T. & Kim, J.S. Therapeutic applications of CRISPR RNA-guided genome editing. *Brief*  
390 *Funct Genomics* **16**, 38-45 (2017).
- 391 5. Maeder, M.L. & Gersbach, C.A. Genome-editing Technologies for Gene and Cell Therapy.  
392 *Mol Ther* (2016).
- 393 6. Kanchiswamy, C.N., Maffei, M., Malnoy, M., Velasco, R. & Kim, J.S. Fine-Tuning Next-  
394 Generation Genome Editing Tools. *Trends Biotechnol* **34**, 562-574 (2016).
- 395 7. Tsai, S.Q. & Joung, J.K. Defining and improving the genome-wide specificities of CRISPR-  
396 Cas9 nucleases. *Nat Rev Genet* **17**, 300-312 (2016).
- 397 8. Tsai, S.Q. et al. GUIDE-seq enables genome-wide profiling of off-target cleavage by  
398 CRISPR-Cas nucleases. *Nat Biotechnol* **33**, 187-197 (2015).
- 399 9. Frock, R.L. et al. Genome-wide detection of DNA double-stranded breaks induced by  
400 engineered nucleases. *Nat Biotechnol* **33**, 179-186 (2015).
- 401 10. Ran, F.A. et al. In vivo genome editing using *Staphylococcus aureus* Cas9. *Nature* **520**,  
402 186-191 (2015).
- 403 11. Gao, L. et al. Engineered Cpf1 variants with altered PAM specificities. *Nat Biotechnol*  
404 (2017).
- 405 12. Wang, X. et al. Unbiased detection of off-target cleavage by CRISPR-Cas9 and TALENs  
406 using integrase-defective lentiviral vectors. *Nat Biotechnol* **33**, 175-178 (2015).

- 407 13. Tsai, S.Q. et al. CIRCLE-seq: a highly sensitive in vitro screen for genome-wide CRISPR-  
408 Cas9 nuclease off-targets. *Nat Methods* **14**, 607-614 (2017).
- 409 14. Hsu, P.D. et al. DNA targeting specificity of RNA-guided Cas9 nucleases. *Nat Biotechnol*  
410 **31**, 827-832 (2013).
- 411 15. Jiang, W., Bikard, D., Cox, D., Zhang, F. & Marraffini, L.A. RNA-guided editing of bacterial  
412 genomes using CRISPR-Cas systems. *Nat Biotechnol* **31**, 233-239 (2013).
- 413 16. Ding, Q. et al. Permanent alteration of PCSK9 with in vivo CRISPR-Cas9 genome editing.  
414 *Circ Res* **115**, 488-492 (2014).
- 415 17. Yin, H. et al. Structure-guided chemical modification of guide RNA enables potent non-  
416 viral in vivo genome editing. *Nat Biotechnol* **35**, 1179-1187 (2017).
- 417 18. Yin, H. et al. Therapeutic genome editing by combined viral and non-viral delivery of  
418 CRISPR system components in vivo. *Nat Biotechnol* (2016).
- 419 19. Gao, X. et al. Treatment of autosomal dominant hearing loss by in vivo delivery of  
420 genome editing agents. *Nature* **553**, 217-221 (2018).
- 421 20. Bengtsson, N.E. et al. Muscle-specific CRISPR/Cas9 dystrophin gene editing ameliorates  
422 pathophysiology in a mouse model for Duchenne muscular dystrophy. *Nat Commun* **8**,  
423 14454 (2017).
- 424 21. Long, C. et al. Prevention of muscular dystrophy in mice by CRISPR/Cas9-mediated  
425 editing of germline DNA. *Science* **345**, 1184-1188 (2014).
- 426 22. Nelson, C.E. et al. In vivo genome editing improves muscle function in a mouse model of  
427 Duchenne muscular dystrophy. *Science* **351**, 403-407 (2016).

- 428 23. Sanchez-Rivera, F.J. et al. Rapid modelling of cooperating genetic events in cancer  
429 through somatic genome editing. *Nature* **516**, 428-431 (2014).
- 430 24. Suzuki, K. et al. In vivo genome editing via CRISPR/Cas9 mediated homology-  
431 independent targeted integration. *Nature* **540**, 144-149 (2016).
- 432 25. Swiech, L. et al. In vivo interrogation of gene function in the mammalian brain using  
433 CRISPR-Cas9. *Nature biotechnology* **33**, 102-106 (2015).
- 434 26. Wu, Y. et al. Correction of a genetic disease in mouse via use of CRISPR-Cas9. *Cell stem*  
435 *cell* **13**, 659-662 (2013).
- 436 27. Tabebordbar, M. et al. In vivo gene editing in dystrophic mouse muscle and muscle stem  
437 cells. *Science* **351**, 407-411 (2016).
- 438 28. Koo, T. et al. Selective disruption of an oncogenic mutant allele by CRISPR/Cas9 induces  
439 efficient tumor regression. *Nucleic Acids Res* **45**, 7897-7908 (2017).
- 440 29. Xue, W. et al. CRISPR-mediated direct mutation of cancer genes in the mouse liver.  
441 *Nature* (2014).
- 442 30. Han, J. et al. Efficient in vivo deletion of a large imprinted lncRNA by CRISPR/Cas9. *RNA*  
443 *Biol* **11**, 829-835 (2014).
- 444 31. Kim, E. et al. In vivo genome editing with a small Cas9 orthologue derived from  
445 *Campylobacter jejuni*. *Nat Commun* **8**, 14500 (2017).
- 446 32. Bae, S., Park, J. & Kim, J.S. Cas-OFFinder: a fast and versatile algorithm that searches for  
447 potential off-target sites of Cas9 RNA-guided endonucleases. *Bioinformatics* **30**, 1473-  
448 1475 (2014).

- 449 33. Kleinstiver, B.P. et al. High-fidelity CRISPR-Cas9 nucleases with no detectable genome-  
450 wide off-target effects. *Nature* **529**, 490-495 (2016).
- 451 34. Slaymaker, I.M. et al. Rationally engineered Cas9 nucleases with improved specificity.  
452 *Science* **351**, 84-88 (2016).
- 453 35. Chen, J.S. et al. Enhanced proofreading governs CRISPR-Cas9 targeting accuracy. *Nature*  
454 (2017).
- 455 36. Zuris, J.A. et al. Cationic lipid-mediated delivery of proteins enables efficient protein-  
456 based genome editing in vitro and in vivo. *Nat Biotechnol* (2014).
- 457 37. Lessard, S. et al. Human genetic variation alters CRISPR-Cas9 on- and off-targeting  
458 specificity at therapeutically implicated loci. *Proc Natl Acad Sci U S A* **114**, E11257-  
459 E11266 (2017).
- 460 38. Scott, D.A. & Zhang, F. Implications of human genetic variation in CRISPR-based  
461 therapeutic genome editing. *Nat Med* **23**, 1095-1101 (2017).
- 462 39. Hodgkins, A. et al. WGE: a CRISPR database for genome engineering. *Bioinformatics*  
463 (*Oxford, England*) **31**, 3078-3080 (2015).
- 464 40. Tsai, S.Q., Topkar, V.V., Joung, J.K. & Aryee, M.J. Open-source guideseq software for  
465 analysis of GUIDE-seq data. *Nat Biotechnol* **34**, 483 (2016).
- 466 41. Rohland, N. & Reich, D. Cost-effective, high-throughput DNA sequencing libraries for  
467 multiplexed target capture. *Genome Res* **22**, 939-946 (2012).
- 468 42. Pinello, L. et al. Analyzing CRISPR genome-editing experiments with CRISPResso. *Nat*  
469 *Biotechnol* **34**, 695-697 (2016).

470 43. Li, H. et al. The Sequence Alignment/Map format and SAMtools. *Bioinformatics* **25**,  
471 2078-2079 (2009).

472

### 473 **Acknowledgements**

474 J.K.J. is supported by the Desmond and Ann Heathwood MGH Research Scholar Award. J.K.J.,  
475 M.L.B., and J.G. were supported by a sponsored research agreement with AstraZeneca. L.P. is  
476 supported by a National Human Genome Research Institute (NHGRI) Career Development  
477 Award (R00HG008399). J.K.J., M.J.A. and J.M.L. are supported by a National Institutes of Health  
478 Maximizing Investigators' Research Award (MIRA) (R35 GM118158). J.K.J., L.P. and M.K.C. are  
479 supported by the Defense Advanced Research Projects Agency (HR0011-17-2-0042). We thank  
480 Mike Snowden, Stefan Platz and Steve Rees for resource allocation from AstraZeneca Research  
481 Funds. We thank Jonathan Y. Hsu for helpful discussions and input.

482

### 483 **Author Contributions**

484 P.A., M.J.P., A.C., T.B., M.B., M.M., and R.N. performed *in vivo* experiments. M.L.B., J.A.G.,  
485 S.Q.T., and N.T.N. performed the CIRCLE-seq and targeted amplicon sequencing off-target  
486 experiments. J.M.L., M.K.C., S.P.G., L.P., and M.J.A. performed bioinformatic and computational  
487 analysis of the off-target experiments. M.A.F. generated AstraZeneca proprietary software for  
488 gRNA identification. P.A., M.L.B., S.Q.T., M.M., M.B-Y., R.N., M.D.F, L.M.M., F.S., and J.K.J.  
489 conceived of and designed the study. P.A., M.L.B., M.M., and J.K.J. organized and supervised  
490 experiments. P.A., M.L.B., J.A.G., M.M., and J.K.J. prepared the manuscript with input from all  
491 authors.

492

493 **Competing interests**

494 J.K.J. has financial interests in Beam Therapeutics, Editas Medicine, Monitor Biotechnologies,  
495 Pairwise Plants, Poseida Therapeutics, and Transposagen Biopharmaceuticals. M.J.A. and  
496 S.Q.T. have financial interests in Monitor Biotechnologies. J.K.J.'s and M.J.A.'s interests were  
497 reviewed and are managed by Massachusetts General Hospital and Partners HealthCare in  
498 accordance with their conflict of interest policies. P.A., M.D.F., M.J.P., M.A.F., F.S., M.B., R.N.,  
499 M.B.Y. and M.M. are employees and shareholders of AstraZeneca. L.M.M. is an employee and  
500 shareholder of GE Healthcare and a shareholder of AstraZeneca.

501

502

503

504 **Figure and Extended Data Figure Legends**

505

506 **Figure 1.** Overview and validation of the Verification of *In Vivo* Off-Targets (VIVO) method. **(a)**

507 Schematic overview of the two-step VIVO method. In Step 1, CIRCLE-seq identifies off-target

508 sites cleaved *in vitro*. In Step 2, sites identified in Step 1 are assessed for indel mutations by

509 targeted amplicon sequencing of sites *in vivo* from the livers of nuclease-treated mice. **(b)**

510 Sequence and location of the SpCas9 promiscuous gP gRNA target site in the mouse *Pcsk9*

511 locus. Blue bars indicate exons. The PAM sequence is in bold and the spacer sequence is

512 underlined. **(c)** Surveyor assay demonstrating efficient *in vivo* modification of the on-target site

513 in mouse liver by the gP gRNA and SpCas9 nuclease. Assays were performed 4 days and 3 weeks

514 after administration of adenoviral vectors encoding gP and SpCas9 (“gP”) or GFP and SpCas9

515 (“GFP”) using genomic DNA isolated from livers of wild-type C57BL/6N (WT) mice or a

516 derivative strain harbouring a single copy of the human *PCSK9* cDNA gene knocked into the

517 *Rosa26* locus (KI). Green asterisks indicate uncleaved PCR products and red asterisks indicate

518 cleaved PCR products expected following treatment with Surveyor nuclease. **(d)** Plasma mouse

519 *Pcsk9* protein levels measured in WT and KI mice and plasma human PCSK9 protein levels

520 measured in KI mice following nuclease treatment. Protein levels were assessed 4 days, 7 days,

521 and 3 weeks following administration of gP or control GFP adenoviral vectors and normalized to

522 baseline levels. Differences between experimental and control groups were determined using

523 two-way ANOVA and Dunnet’s multiple comparisons test with asterisks indicating differences

524 with  $p < 0.05$ . All values are presented as group means, error bars represent standard error of

525 the mean (SEM). **(e)** Scatterplot of CIRCLE-seq read counts for sites identified with gP/SpCas9



526 on genomic DNA from WT and KI mice. Read counts are shown on a log scale and colors  
527 indicate the number of mismatches in each off-target site relative to the on-target site. Sites  
528 shown as triangles were chosen for targeted amplicon sequencing.

529

530 **Figure 2.** Assessment of *in vivo* off-target indel mutations induced by gP/SpCas9. Indel mutation  
531 frequencies determined by targeted amplicon sequencing (using high-throughput sequencing)  
532 are presented as heat maps for the gP/SpCas9 on-target site (black square) and Class I, Class II,  
533 and Class III off-target sites (defined in the text) identified from CIRCLE-seq experiments. Each  
534 locus was assayed in three different mice (1, 2, 3) using genomic DNA isolated from the liver of  
535 WT and KI mice treated with experimental adenoviral vector encoding gP/SpCas9 (gRNA +) or  
536 control adenoviral vector GFP/SpCas9 (gRNA -). For each site, mismatches relative to the on-  
537 target site are shown with colored boxes and bases in the spacer sequence are numbered from  
538 1 (most PAM-proximal) to 20 (most PAM-distal). The number of read counts found for each site  
539 from the CIRCLE-seq experiments on WT and KI mouse genomic DNA are shown in the left  
540 columns (ranked from highest to lowest based on read counts in the WT genomic DNA CIRCLE-  
541 seq experiment). Each box in the heatmap represents a single sequencing experiment. Sites  
542 that showed a significant difference between the experimental gRNA + and gRNA - samples are  
543 highlighted with an orange outline around the box. Sites identified as having a significant  
544 difference and located within the coding sequence of a gene or in non-coding sequence are  
545 labeled to the right of the heatmap.

546

547 **Figure 3.** Characterization of *Pcsk9*-targeted gRNAs designed to be orthogonal to the mouse  
548 genome. **(a)** Sequence and location of the SpCas9 gM (mouse) and gMH (mouse & human)  
549 gRNA target sites in the endogenous mouse *Pcsk9* gene and human *PCSK9* transgene inserted at  
550 the mouse *Rosa26* locus. Blue bars indicate exons. PAM sequence for the sites is in bold and the  
551 spacer sequence is underlined. The single base position mismatched between the gMH target  
552 site and the site in the human *PCSK9* transgene is highlighted in red. **(b)** Surveyor assay  
553 demonstrating efficient *in vivo* modification of the on-target endogenous mouse *Pcsk9* site and  
554 human *PCSK9* transgene in mouse liver. Assays were performed 4 days and 3 weeks following  
555 administration of adenoviral vectors encoding gM and SpCas9 (“gP”), gMH and SpCas9 (“gMH”) or  
556 GFP and SpCas9 (“GFP”) using genomic DNA isolated from livers of WT and KI mice. Green  
557 asterisks indicate uncleaved PCR products and red asterisks indicate cleaved PCR products  
558 expected following treatment with Surveyor nuclease. **(c)** Plasma mouse *Pcsk9* protein levels  
559 measured in WT and KI mice and plasma human *PCSK9* protein levels measured in KI mice  
560 following CRISPR-Cas nuclease treatment. Plasma protein levels were assessed 4 days, 7 days,  
561 and 3 weeks following administration of gP or control GFP adenoviral vectors and normalized to  
562 baseline levels at each timepoint. Differences between groups were determined using two-way  
563 ANOVA and Dunnet’s multiple comparisons test with asterisks indicating differences with  
564  $p < 0.05$ . All values are presented as group means, error bars represent standard error of the  
565 mean (SEM). **(d)** Scatterplot of CIRCLE-seq read counts for sites identified with gM/SpCas9 and  
566 gMH/Cas9 on genomic DNA from WT and KI mice. Read counts are shown on a log scale and  
567 colors indicate the number of mismatches in each off-target site relative to the on-target site.  
568 Sites shown as triangles were chosen for targeted amplicon sequencing.

569

570 **Figure 4.** Assessment of *in vivo* off-target indel mutations induced by gM/SpCas9. Indel  
571 mutation frequencies determined by targeted amplicon sequencing (using high-throughput  
572 sequencing) are presented as heat maps for the gM/SpCas9 on-target site (black square) and  
573 181 off-target sites identified from CIRCLE-seq experiments. Each locus was assayed in three  
574 different mice (1, 2, 3) using genomic DNA isolated from the liver of WT and KI mice treated  
575 with experimental adenoviral vector encoding gM/SpCas9 (gRNA +) or control adenoviral vector  
576 GFP/SpCas9 (gRNA -). For each site, mismatches relative to the on-target site are shown with  
577 colored boxes and bases in the spacer sequence are numbered from 1 (most PAM-proximal) to  
578 20 (most PAM-distal). The number of read counts found for each site from the CIRCLE-seq  
579 experiments on WT and KI mouse genomic DNA are shown in the left columns (ranked from  
580 highest to lowest based on counts in the WT genomic DNA CIRCLE-seq experiment). Each box in  
581 the heatmap represents a single sequencing experiment. The single site (the on-target site) that  
582 was significantly different between the experimental gRNA + and control gRNA - samples is  
583 highlighted with an orange outline around the boxes. Additional closely matched sites in the  
584 mouse genome (not identified from the CIRCLE-seq experiments) that were examined for indel  
585 mutations are boxed in red at the bottom of the figure.

586

587 **Extended Data Fig. 1.** Bio-distribution studies of adenovirus-serotype 5 in mice. (a) Schematic  
588 of integrated reporter construct in R26R mice used to assess delivery of Cre recombinase using  
589 adenovirus-serotype 5 vector. Cre-mediated excision of a *loxP*-flanked transcriptional stop  
590 signal upstream of a *lacZ* gene results in expression of beta-galactosidase enzyme. Beta-

591 galactosidase expression can be quantified by staining dissected tissues with X-gal, a compound  
592 that turns blue when cleaved by this enzyme. **(b)** Quantification of beta-galactosidase  
593 expression in sections of various dissected organs from two R26R mice intravenously injected  
594 with adenovirus-serotype 5 vector encoding Cre. Matched organs sections from a R26R mouse  
595 intravenously injected with an adenovirus-serotype 5 vector encoding GFP were used to  
596 determine background staining levels and serve as a negative control. Matched organ sections  
597 from Z/EG mice that constitutively express lacZ (beta-galactosidase) and intravenously injected  
598 with PBS (rather than adenovirus) were used to provide positive staining controls. All mice were  
599 evaluated one week after adenovirus or PBS injection.

600

601 **Extended Data Fig. 2.** Venn diagrams comparing off-target cleavage sites in mouse genomic  
602 DNA identified by CIRCLE-seq experiments with closely matched sites (up to six mismatches  
603 relative to the on-target site) in the mouse genome identified *in silico* by Cas-OFFinder.  
604 Diagrams are shown for SpCas9 gRNAs gP, gM, and gMH.

605

606 **Extended Data Fig. 3.** Assessment of *in vivo* off-target indel mutations induced by gMH/SpCas9.  
607 Indel mutation frequencies determined by targeted amplicon sequencing (using high-  
608 throughput sequencing) are presented as heat maps for the gMH/SpCas9 on-target site (black  
609 square) and 63 off-target sites identified from CIRCLE-seq experiments. Each locus was assayed  
610 in three different mice (1, 2, 3) using genomic DNA isolated from the liver of WT and KI mice  
611 treated with experimental adenoviral vector encoding gM/SpCas9 (gRNA +) or control  
612 adenoviral vector GFP/SpCas9 (gRNA -). For each site, mismatches relative to the on-target site

613 are shown with colored boxes and bases in the spacer sequence are numbered from 1 (most  
614 PAM-proximal) to 20 (most PAM-distal). The number of read counts found for each site from  
615 the CIRCLE-seq experiments on WT and KI mouse genomic DNA are shown in the left columns  
616 (ranked from highest to lowest based on counts in the WT genomic DNA CIRCLE-seq  
617 experiment). Each box in the heatmap represents a single sequencing experiment. Sites that  
618 were significantly different between the experimental gRNA + and control gRNA – samples are  
619 highlighted with a red outline around the boxes. Additional closely matched sites in the mouse  
620 genome (not identified from the CIRCLE-seq experiments) that were examined for indel  
621 mutations are boxed in red at the bottom of the figure.

622

623 **Extended Data Table 1: Numbers of off-target sites for gP, gM, and gMH gRNAs identified by**  
 624 **Cas-OFFinder (*in silico*) and CIRCLE-seq (experimental).** For sites identified by CIRCLE-seq, the  
 625 numbers of sites found in the WT and KI mouse are shown and the total number of unique sites  
 626 found between the two experiments.

|      |                          | Sites with canonical NGG PAM             |    |     |       |      |       |       |       |
|------|--------------------------|------------------------------------------|----|-----|-------|------|-------|-------|-------|
|      |                          | Number of spacer mismatches              |    |     |       |      |       |       |       |
| gRNA | Method                   | 0                                        | 1  | 2   | 3     | 4    | 5     | 6     | 7     |
| gP   | Cas-OFFinder             | 1                                        | 5  | 41  | 355   | 1073 | 3347  | 21900 | 94051 |
|      | CIRCLE-seq (total WT&KI) | 1                                        | 5  | 38  | 231   | 121  | 44    | 15    | 4     |
|      | CIRCLE-seq (WT mouse)    | 1                                        | 5  | 38  | 226   | 117  | 43    | 13    | 2     |
|      | CIRCLE-seq (KI mouse)    | 1                                        | 5  | 38  | 218   | 93   | 25    | 11    | 4     |
| gM   | Cas-OFFinder             | 1                                        | 0  | 0   | 8     | 77   | 780   | 8315  | 55093 |
|      | CIRCLE-seq (total WT&KI) | 1                                        | 0  | 0   | 4     | 18   | 36    | 32    | 25    |
|      | CIRCLE-seq (WT mouse)    | 1                                        | 0  | 0   | 4     | 17   | 26    | 23    | 17    |
|      | CIRCLE-seq (KI mouse)    | 1                                        | 0  | 0   | 3     | 17   | 30    | 23    | 14    |
| gMH  | Cas-OFFinder             | 1                                        | 1  | 1   | 15    | 178  | 1609  | 10992 | 55363 |
|      | CIRCLE-seq (total WT&KI) | 1                                        | 1  | 1   | 9     | 52   | 65    | 82    | 159   |
|      | CIRCLE-seq (WT mouse)    | 1                                        | 0  | 1   | 8     | 46   | 46    | 45    | 81    |
|      | CIRCLE-seq (KI mouse)    | 1                                        | 1  | 1   | 9     | 43   | 53    | 64    | 102   |
|      |                          | Sites with PAM harboring single mismatch |    |     |       |      |       |       |       |
|      |                          | Number of spacer mismatches              |    |     |       |      |       |       |       |
| gRNA | Method                   | 0                                        | 1  | 2   | 3     | 4    | 5     | 6     |       |
| gP   | Cas-OFFinder             | 0                                        | 16 | 370 | 12028 | 9828 | 20097 | 70495 |       |
|      | CIRCLE-seq (total WT&KI) | 0                                        | 14 | 279 | 2160  | 271  | 31    | 6     |       |
|      | CIRCLE-seq (WT mouse)    | 0                                        | 14 | 272 | 1648  | 164  | 13    | 2     |       |
|      | CIRCLE-seq (KI mouse)    | 0                                        | 14 | 271 | 1904  | 262  | 31    | 4     |       |
| gM   | Cas-OFFinder             | 0                                        | 0  | 1   | 20    | 423  | 4911  | 34722 |       |
|      | CIRCLE-seq (total WT&KI) | 0                                        | 0  | 1   | 3     | 18   | 18    | 10    |       |
|      | CIRCLE-seq (WT mouse)    | 0                                        | 0  | 0   | 3     | 15   | 16    | 8     |       |
|      | CIRCLE-seq (KI mouse)    | 0                                        | 0  | 1   | 3     | 14   | 8     | 4     |       |
| gMH  | Cas-OFFinder             | 0                                        | 0  | 7   | 80    | 907  | 8285  | 67109 |       |
|      | CIRCLE-seq (total WT&KI) | 0                                        | 0  | 3   | 19    | 21   | 9     | 17    |       |
|      | CIRCLE-seq (WT mouse)    | 0                                        | 0  | 3   | 18    | 18   | 7     | 9     |       |
|      | CIRCLE-seq (KI mouse)    | 0                                        | 0  | 3   | 16    | 9    | 5     | 13    |       |

627

628 **Extended Data Table 2: Off-target sites identified by CIRCLE-seq for gP, gM, and gMH that**  
629 **exhibit single nucleotide polymorphisms (SNPs).** Single nucleotide mismatches that differ from  
630 the C57/BL6N mouse strain are in red.

| Location of site         | gRNA | gRNA on-target site     | Off-target sequence         | Number o mismatch |
|--------------------------|------|-------------------------|-----------------------------|-------------------|
| chr9:78832014-78832037   | gM   | GGCTGATGAGGCCGCACATGNNG | atCAGATaAaCCaCACATGGag      | 8                 |
| chr4:129226173-129226196 | gMH  | CAGGTTCCATGGGATGCTCTNNG | agGGcTCacctGGATGCTCTGtG     | 8                 |
| chr9:68916733-68916756   | gMH  | CAGGTTCCATGGGATGCTCTNNG | tAGGgagagaGGATGCTCTGaG      | 8                 |
| chr3:19461541-19461564   | gMH  | CAGGTTCCATGGGATGCTCTNNG | CAtGTaCCAaGGGATGtTCTAcG     | 5                 |
| chr13:37109353-37109376  | gP   | AGCAGCAGCGGCGGCAACAGNNG | a-<br>cAGCAGCAGCAGCAACAACGA | 6                 |
| chr6:112201818-112201841 | gP   | AGCAGCAGCGGCGGCAACAGNNG | AGCAAcagcagcagcagcagcagtAG  | 5                 |

631

632

633 **Supplementary Table Legends:**

634 **Supplementary Table 1.** Off-target cleavage sites identified by CIRCLE-seq for SpCas9 and the  
635 gP gRNA. Chromosomal coordinates are provided followed by the CIRCLE-seq readcount for off-  
636 target sites found in WT mouse gDNA, the off-target sequence, number of mismatches, bulge  
637 mismatch sequence, the score of the number of mismatches with bulges, and the CIRCLE-seq  
638 read count for off-targets identified in KI mouse gDNA.

639 **Supplementary Table 2:** Potential off-target sites for gP/SpCas9 analyzed by targeted amplicon  
640 deep sequencing from the livers of WT and KI mice treated with adenoviral vectors. The first  
641 column contains the chromosomal site, followed by the MiSeq run and the FASTQ files the  
642 amplicon sequencing data was retrieved from. The cell-type, time point, treatment, and  
643 replicate follow. The next column gives total read counts obtained for the amplicon followed by  
644 the total number of indels found by CRISPResso and the percent of reads containing indels  
645 found by CRISPResso at the gDNA cut site. Run refers to the alignment of amplicon to the  
646 reference genome and block refers to the run that amplicon was done in. The CIRCLE-seq read  
647 counts for each site are also provided and followed by the off-target sequence, mismatch score  
648 and sequence of the primers used to amplify each amplicon.

649 **Supplementary Table 3:** Off-target cleavage sites identified by CIRCLE-seq for SpCas9 and the  
650 gM gRNA. Chromosomal coordinates are provided followed by the CIRCLE-seq read count for  
651 off-target sites found in WT mouse gDNA, the off-target sequence, number of mismatches,  
652 bulge mismatch sequence, the score of the number of mismatches with bulges, and the CIRCLE-  
653 seq read count for off-targets identified in KI mouse gDNA.



654 **Supplementary Table 4:** Off-target cleavage sites identified by CIRCLE-seq for SpCas9 and the  
655 gMH gRNA. Chromosomal coordinates are provided followed by the CIRCLE-seq read count for  
656 off-target sites found in WT mouse gDNA, the off-target sequence, number of mismatches,  
657 bulge mismatch sequence, the score of the number of mismatches with bulges, and the CIRCLE-  
658 seq read count for off-targets identified in KI mouse gDNA.

659 **Supplementary Table 5:** Potential off-target sites for gM/SpCas9 analyzed by targeted amplicon  
660 deep sequencing from the livers of WT and KI mice treated with adenoviral vectors. The first  
661 column contains the chromosomal site, followed by the MiSeq run and the FASTQ files the  
662 amplicon sequencing data was retrieved from. The cell-type, time point, treatment, and  
663 replicate follow. The next column gives total read count obtained for the amplicon followed by  
664 the total number of indels found by CRISPResso and the percent of reads containing indels  
665 found by CRISPResso at the gDNA cut site. Run refers to the alignment of amplicon to the  
666 reference genome and block refers to the run that amplicon was done in. The CIRCLE-seq read  
667 counts for each site are also provided and followed by the off-target sequence, mismatch score  
668 and sequence of the primers used to amplify each amplicon.

669 **Supplementary Table 6:** Potential off-target sites for gMH/SpCas9 analyzed by targeted  
670 amplicon deep sequencing from the livers of WT and KI mice treated with adenoviral vectors.  
671 The first column contains the chromosomal site, followed by the MiSeq run and the FASTQ files  
672 the amplicon sequencing data was retrieved from. The cell-type, time point, treatment, and  
673 replicate follow. The next column gives total read count obtained for the amplicon followed by  
674 the total number of indels found by CRISPResso and the percent of reads containing indels

675 found by CRISPResso at the gDNA cut site. Run refers to the alignment of amplicon to the  
676 reference genome and block refers to the run that amplicon was done in. The CIRCLE-seq read  
677 counts for each site are also provided and followed by the off-target sequence, mismatch score  
678 and sequence of the primers used to amplify each amplicon.

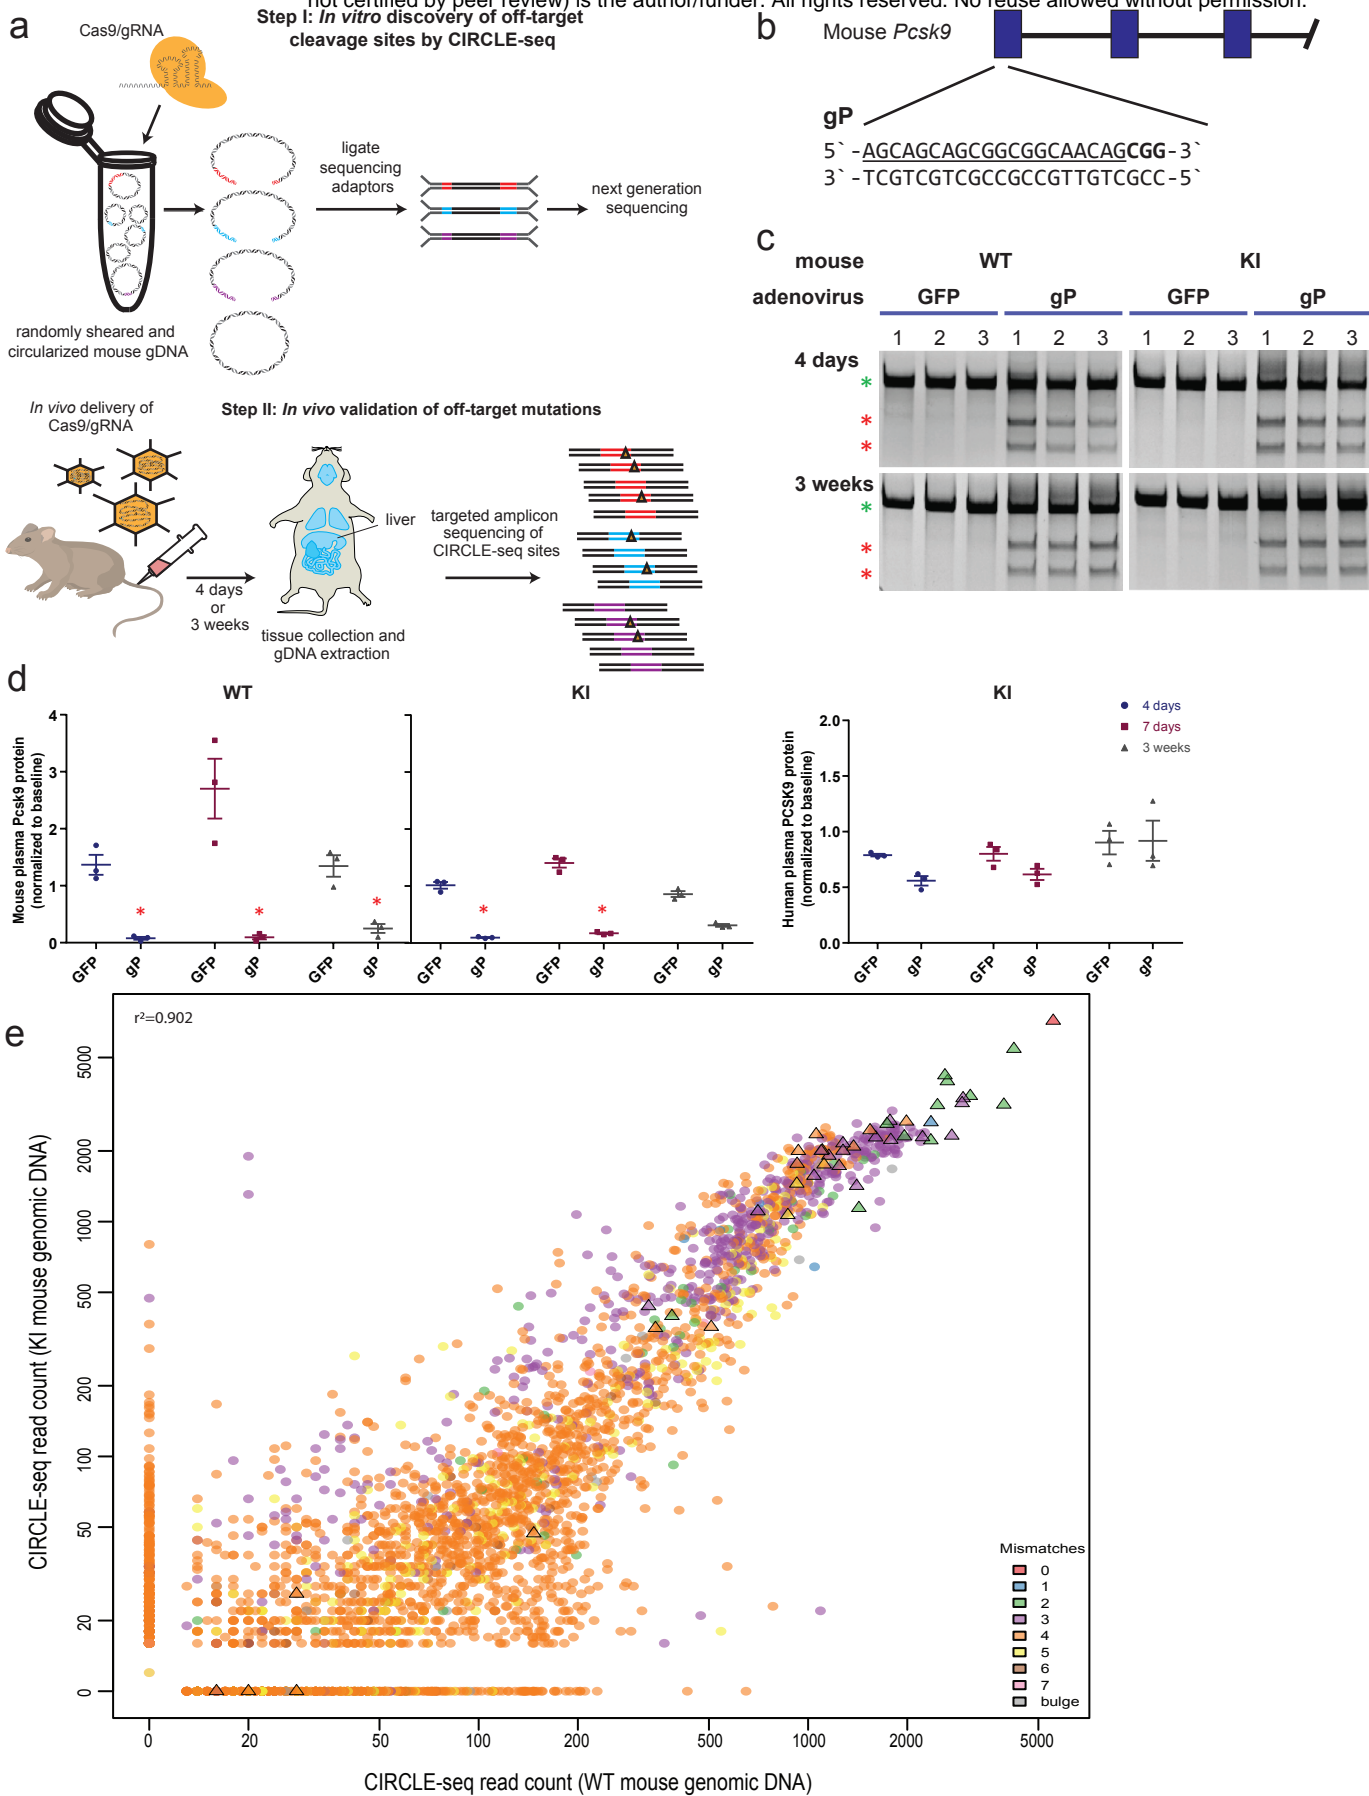

Fig 2

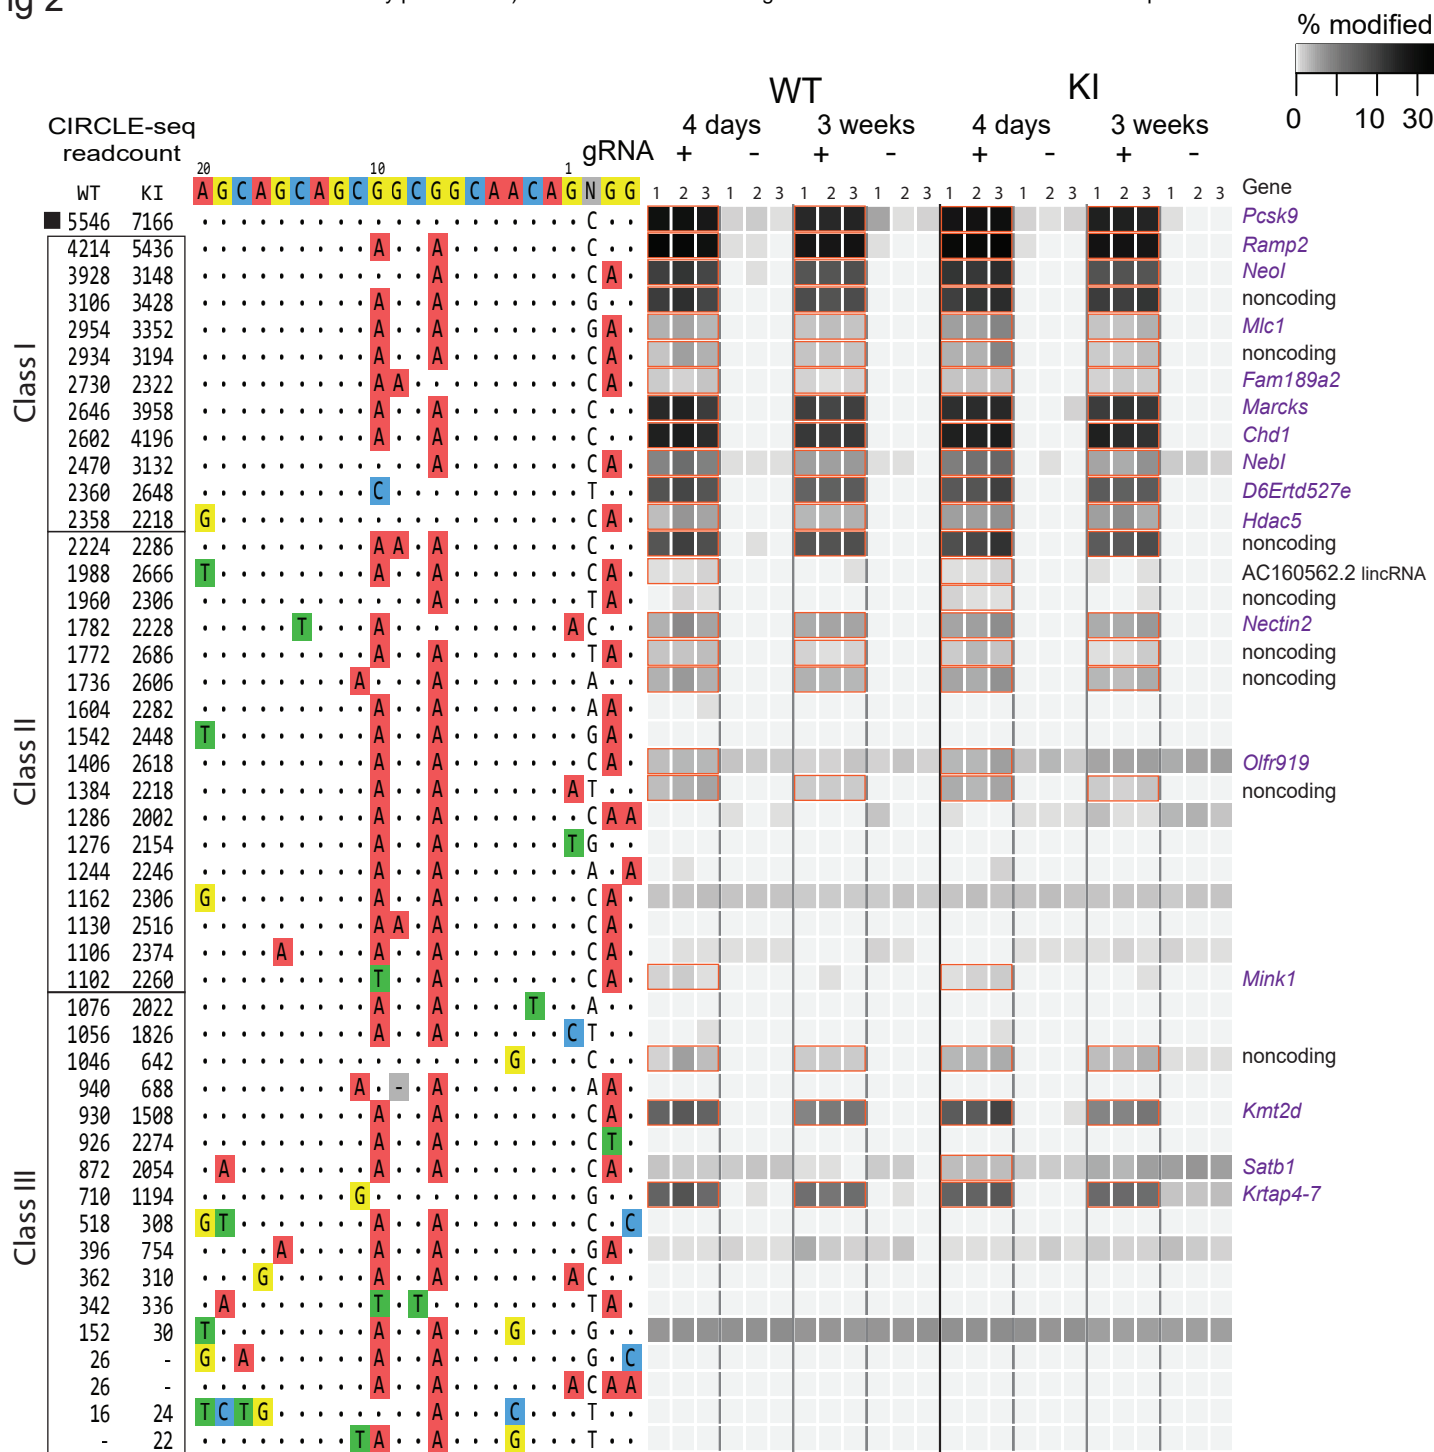

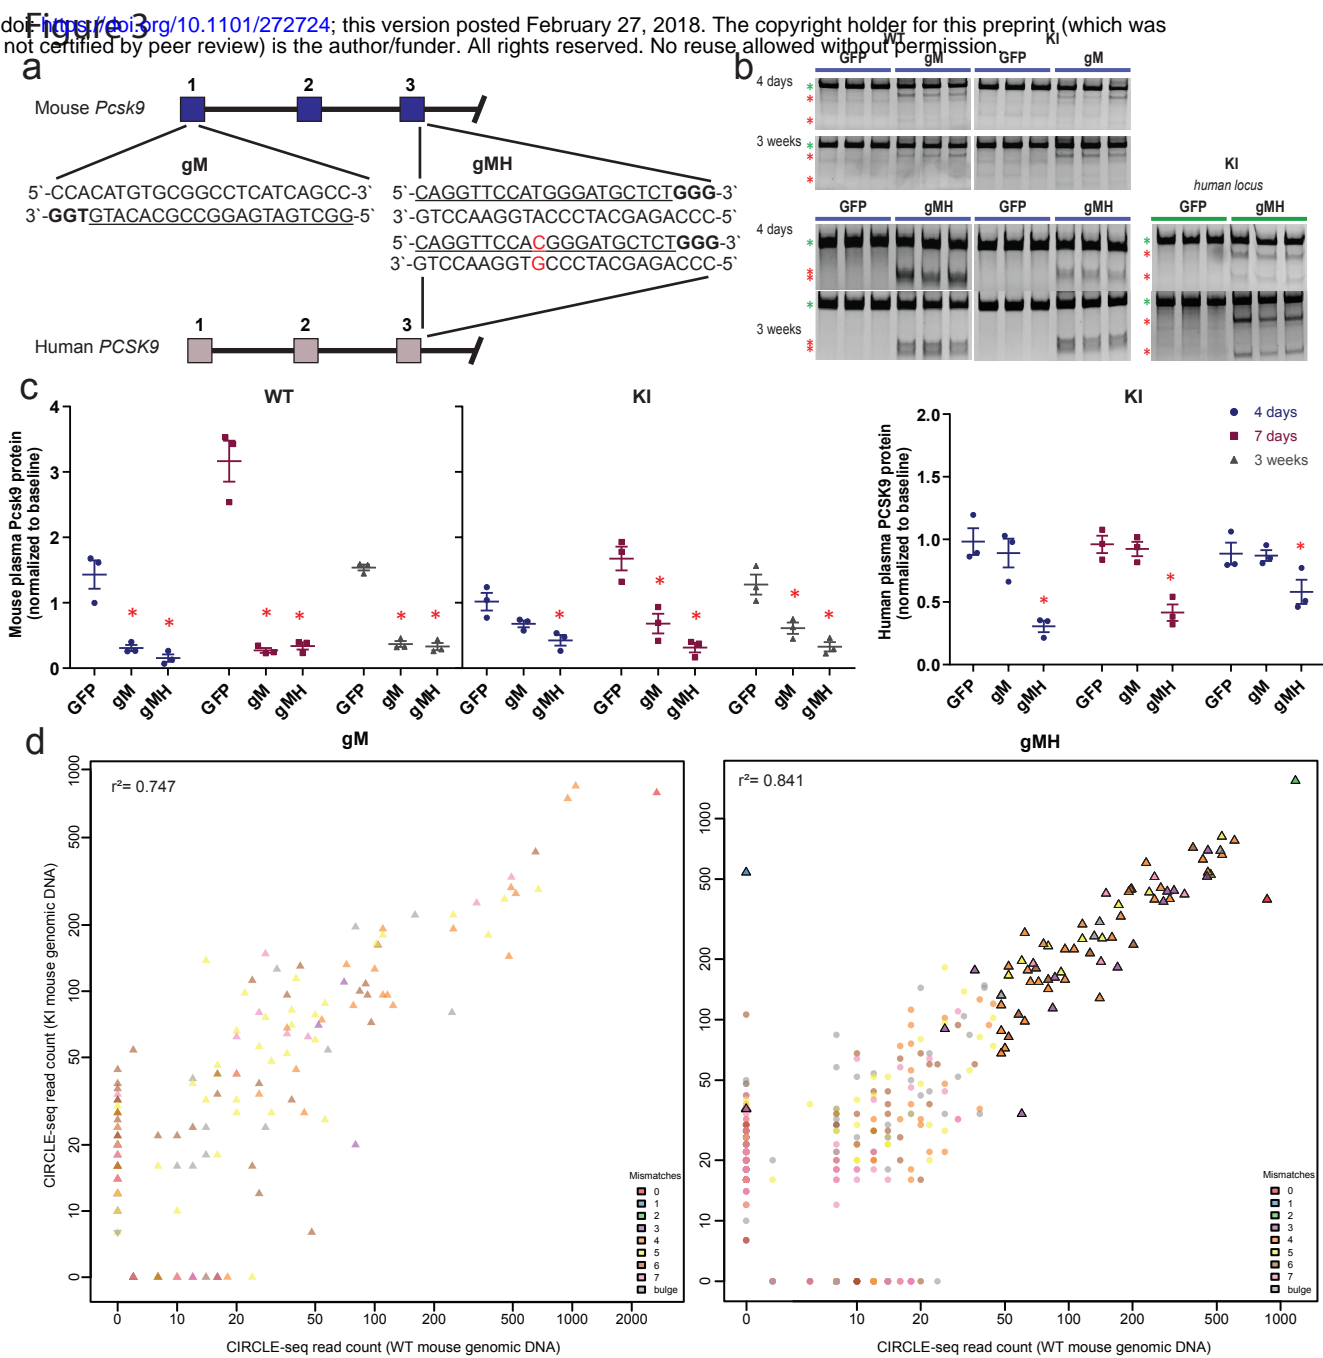

Fig 4

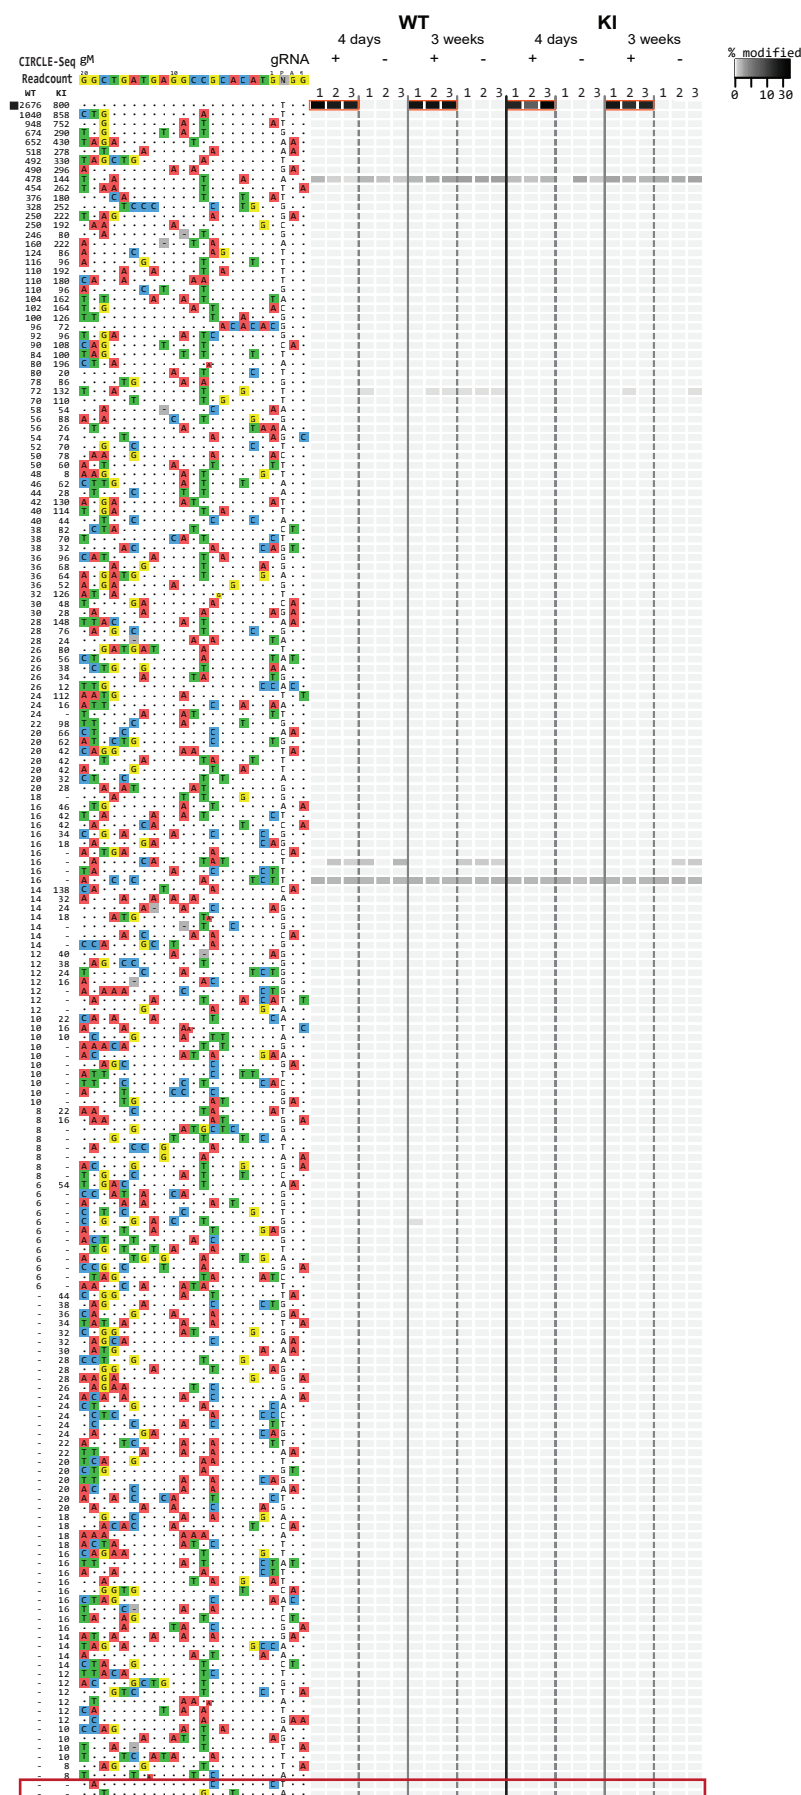

a

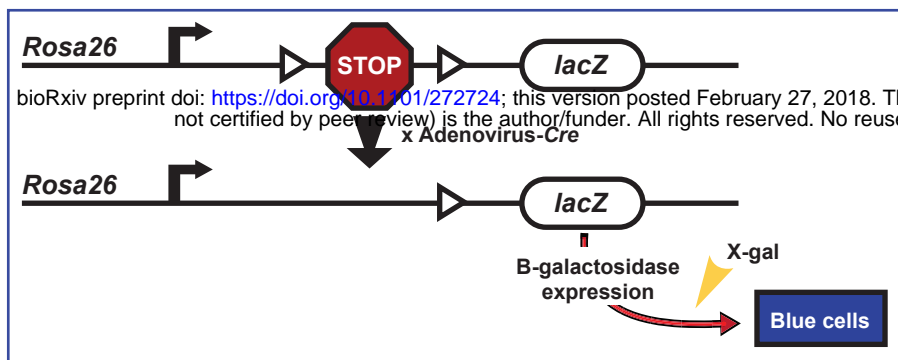

b

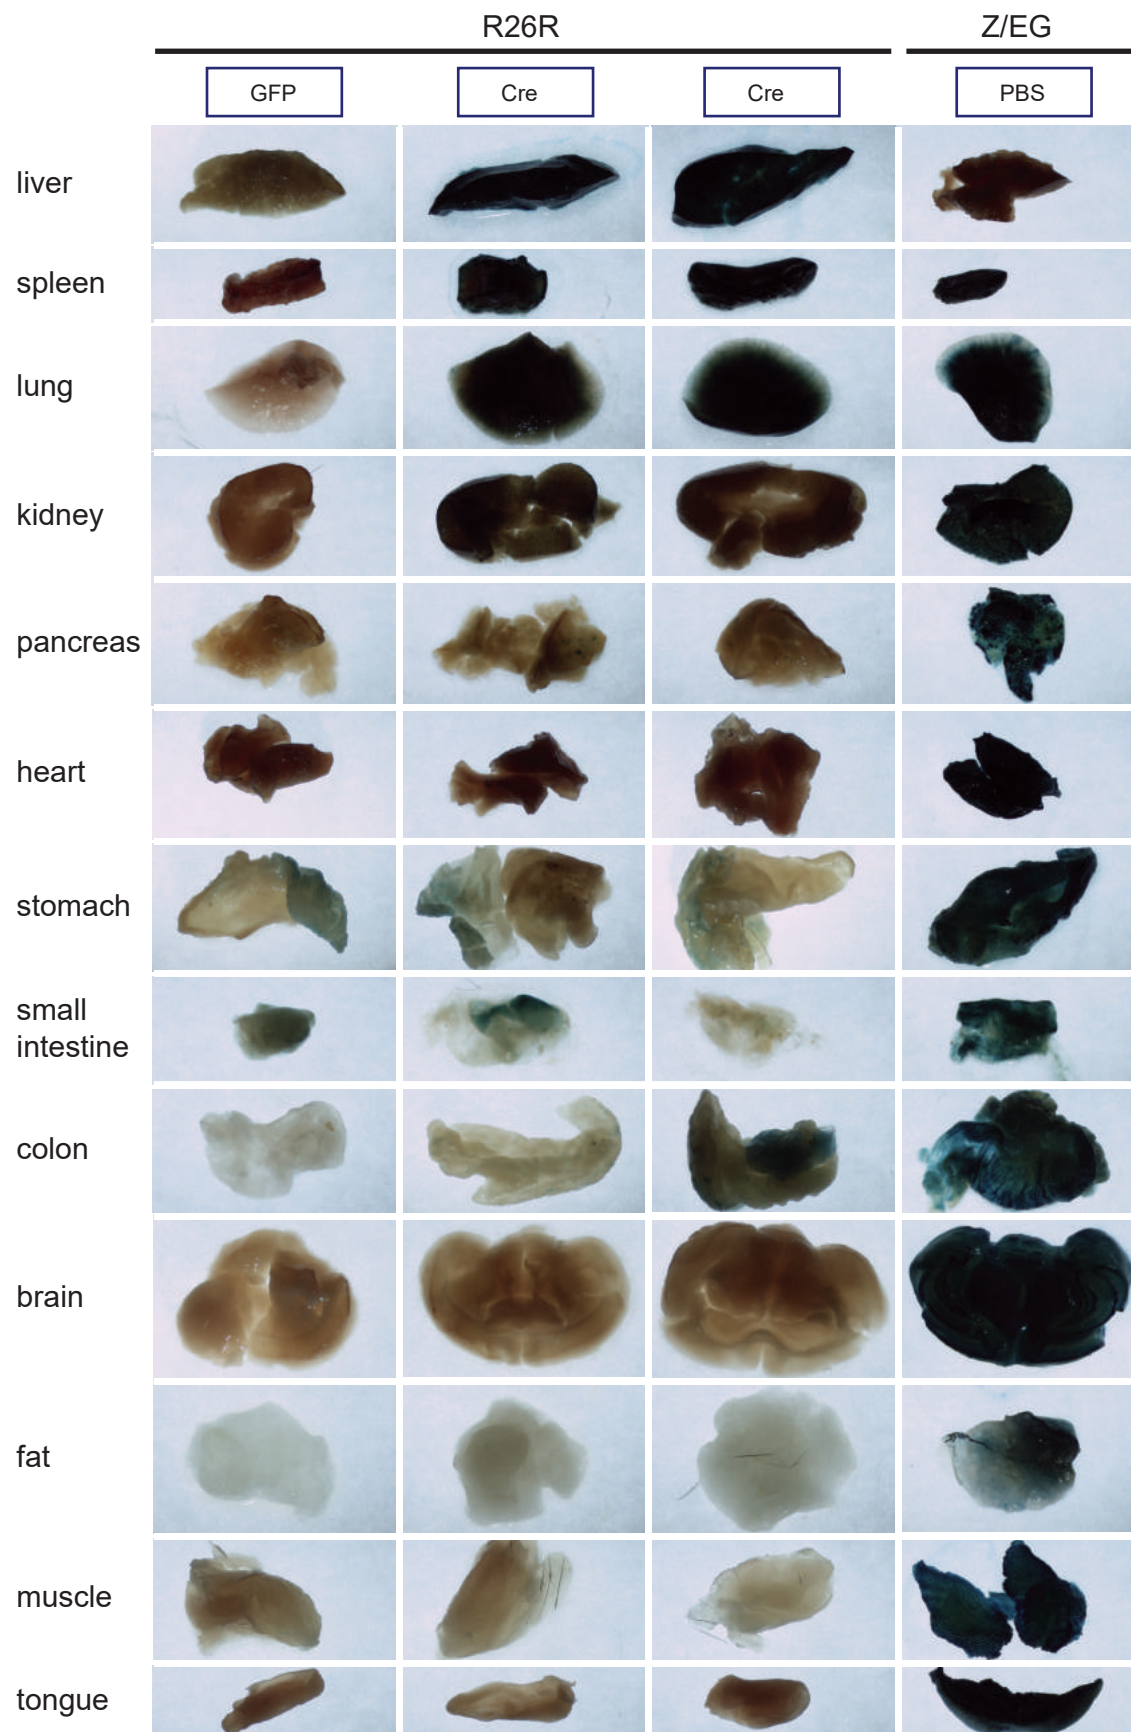

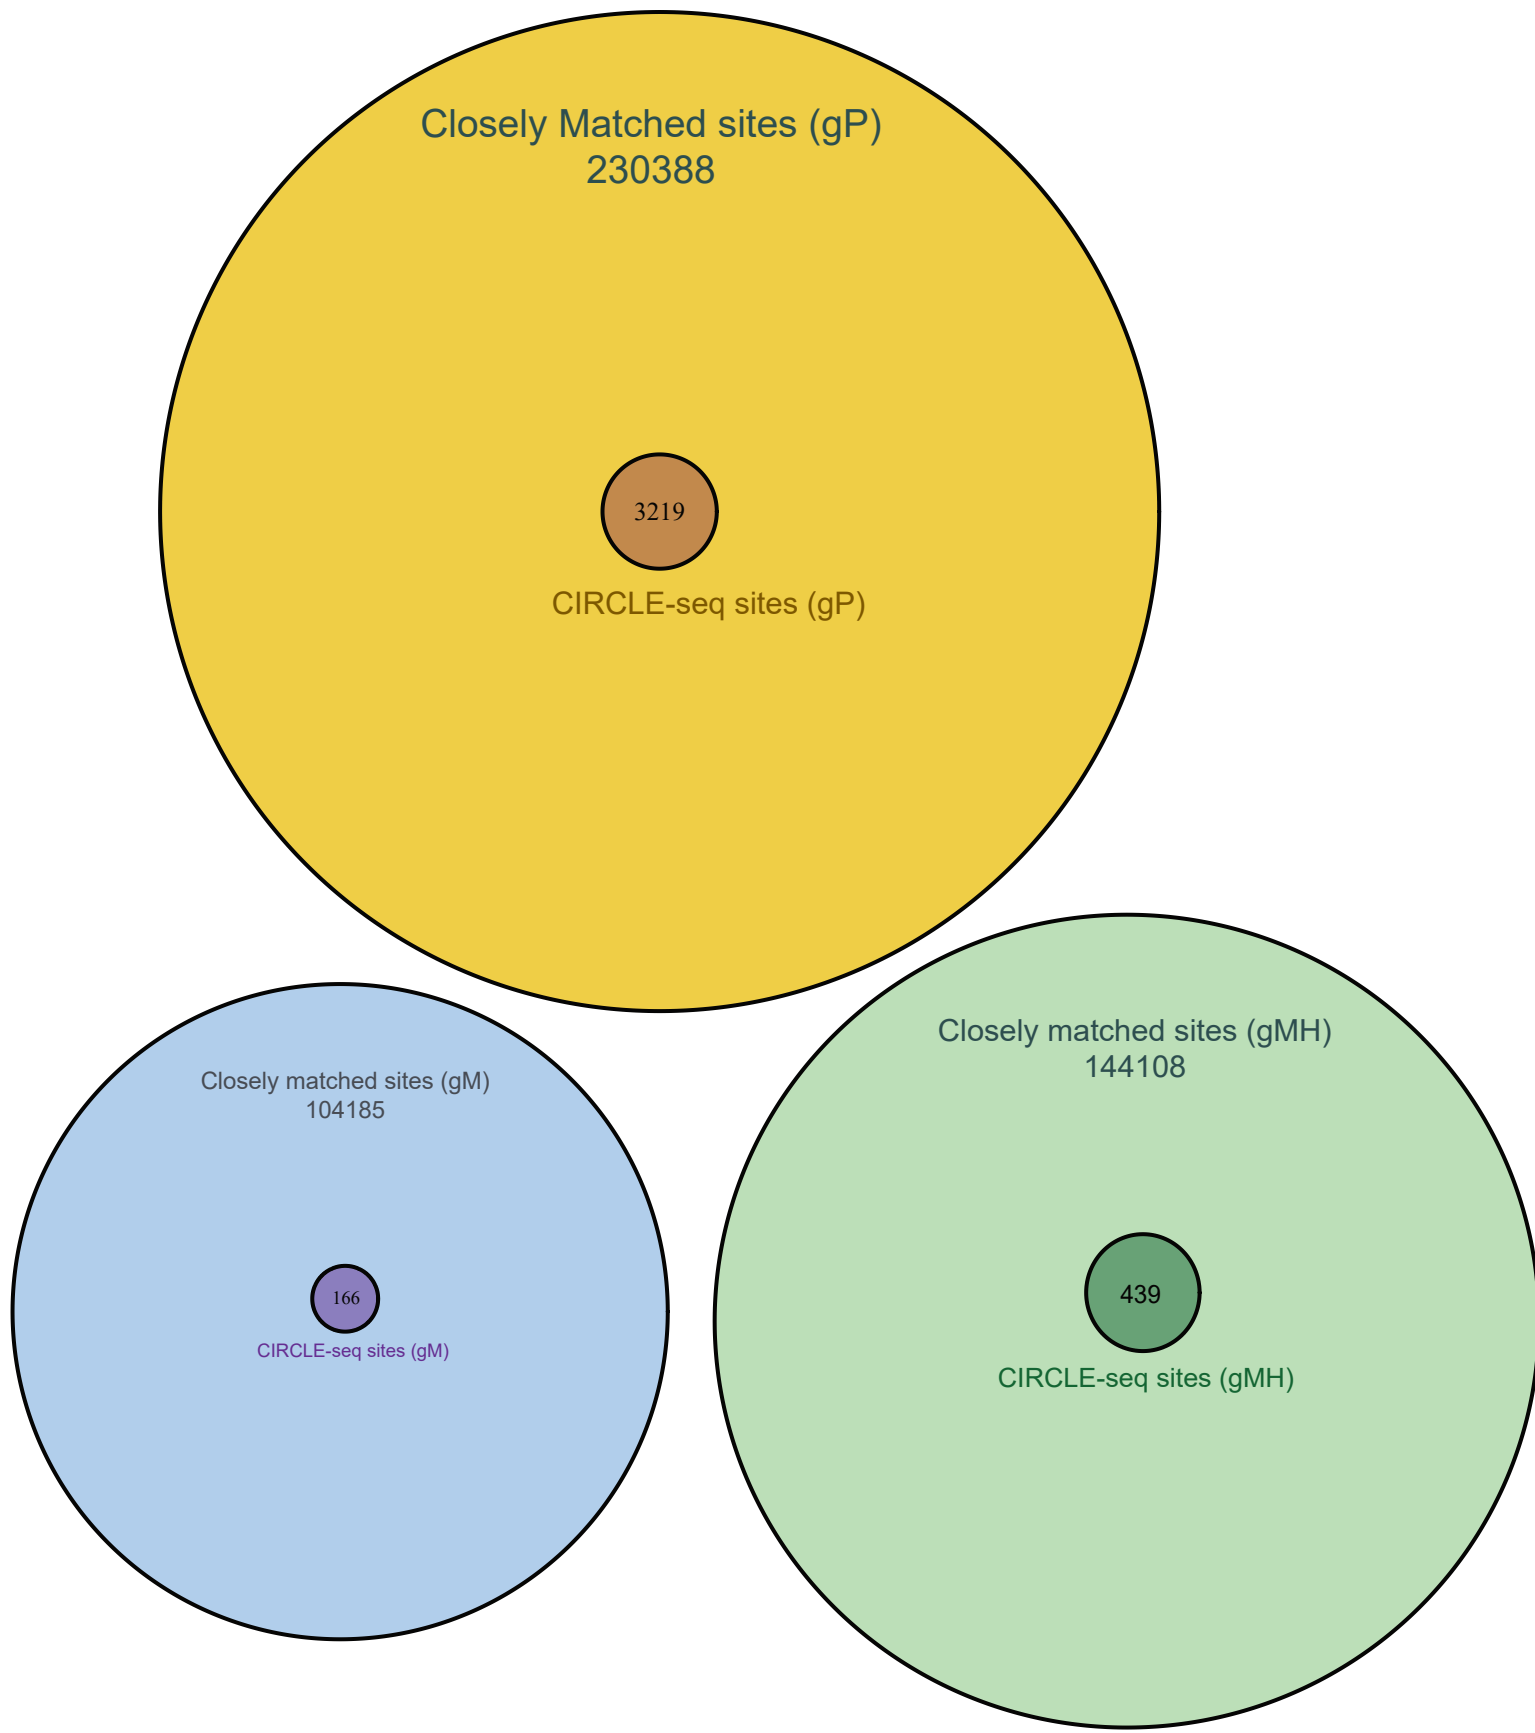



Extended Data Fig. 3

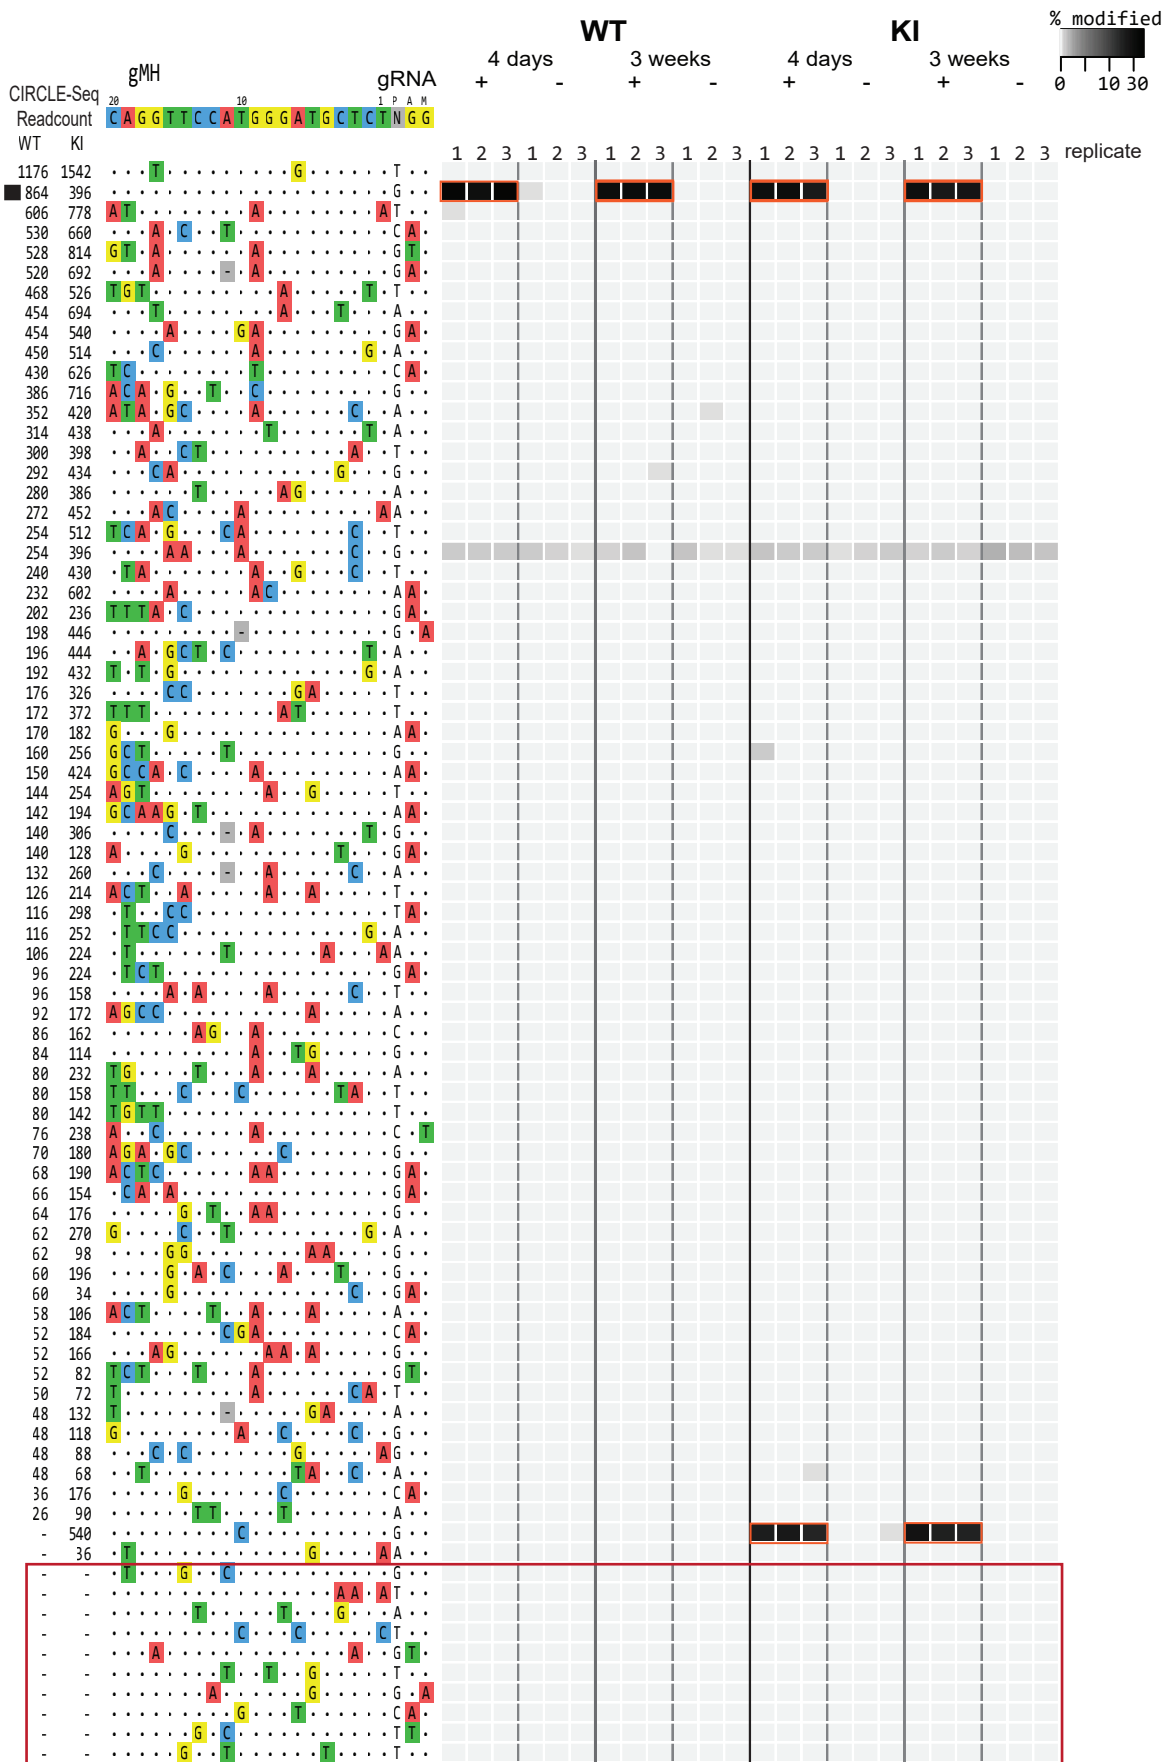

Source: https://www.biorxiv.org/content/biorxiv/early/2018/02/27/272724.full.pdf?%3Fcollection=
